# Supplementary material for: Evaluation of antibody kinetics and durability in healthy individuals vaccinated with inactivated COVID-19 vaccine (CoronaVac): A cross-sectional and cohort study in Zhejiang, China
Source: eLife. 2023 Mar 16;12:e84056. doi: 10.7554/eLife.84056 (PMC10110235; doi:10.7554/eLife.84056)
Supplement: Figure 2—source data 1. [file elife-84056-fig2-data1.xlsx]

## Sheet: antiS+NP IgM
Pre-V	V1-14d	V1-28d	V2-1m	V2-3m	V2-6m	V2-9m	V2-12m
0.29	30.49	0.79	0.13	0.13	0.2	0.18	0.06
0.23	3.68	3.55	0.17	0.2	0.3	0.69	0.07
0.21	3.27	55.19	3.82	0.07	0.05	0.04	0.52
0.33	0.91	4.67	0.22	0.21	0.68	0.09	0.46
0.32	1.27	1.85	3.26	0.2	1.07	0.15	0.21
0.29	7.32	16.32	0.21	0.11	0.24	0.04	0.15
0.22	41.74	5.04	0.42	0.39	0.05	0.16	0.39
0.56	1.77	1.94	1.18	0.09	0.04	0.47	0.76
0.23	2.54	1.64	0.66	0.13	0.24	0.05	0.06
0.33	0.9	3.87	1.31	1.17	0.15	0.1	0.07
0.29	0.52	2.43	0.19	0.06	0.23	0.25	0.06
0.3	4.54	0.7	0.87	0.18	0.42	0.06	0.24
0.58	0.48	6.46	0.49	0.38	0.1	0.18	0.1
0.35	3.25	2.77	0.4	0.12	0.11	0.21	0.74
0.66	5.59	6.16	0.24	0.12	0.12	0.07	0.29
0.26	2.46	4.25	0.59	0.39	0.09	0.06	0.06
0.54	0.97	4.74	0.34	0.08	0.05	0.18	0.07
0.29	11.12	0.34	1.93	0.24	0.34	0.12	0.05
1	4.22	4.09	3.49	0.32	1.18	0.06	0.04
1.25	12.89	1.53	1.34	0.47	0.05	0.18	0.57
0.61	0.93	36.08	17.68	0.12	0.47	1.32	0.08
0.38	0.48	0.57	0.4	0.25	0.15	0.11	0.07
0.54	3.66	2.59	9.1	0.16	0.07	0.14	0.07
0.38	0.9	4.85	0.16	0.04	0.15	0.32	0.05
0.29	0.38	0.45	5.2	0.21	0.29	0.05	0.05
0.31	4.77	8.91	0.1	0.35	0.19	0.73	0.06
0.75	0.53	48.94	1.11	0.39	0.09	0.1	0.07
0.23	1.4	1.36	4.7	0.23	0.76	0.34	0.03
0.41	0.97	2.06	0.12	2.33	0.12	2.2	0.1
0.35	0.83	0.74	1.44	1.87	0.16	0.05	0.2
0.32	0.53	0.96	0.36	0.24	0.16	0.22	0.25
0.19	9.5	0.18	0.53	0.09	0.6	0.38	0.05
0.28	2.96	1.01	0.74	0.17	0.05	0.6	0.25
0.25	0.28	5.1	11.73	0.3	0.23	0.12	0.07
0.44	1.71	0.76	0.43	0.58	0.11	0.25	0.05
0.28	4.12	0.93	0.19	0.07	0.09	0.09	0.11
0.24	0.5	6.33	0.2	0.19	0.1	1.18	0.04
0.32	1.65	9.4	0.12	0.05	0.26	0.07	0.03
0.25	3.01	1.67	0.41	0.4	0.09	0.27	0.4
0.25	1.73	3.73	0.63	0.76	0.06	0.14	0.07
0.24	0.4	11.18	0.35	0.24	0.39	0.2	0.09
0.2	1.25	1.37	0.42	0.9	0.2	0.24	0.07
0.27	4.15	2.07	0.09	0.71	0.31	0.22	0.04
0.41	3.82	0.43	0.62	0.05	0.09	0.74	0.11
0.23	31.18	8.88	0.28	0.09	0.08	0.1	0.06
0.21	0.46	12.39	0.85	0.2	0.09	0.24	0.06
0.43	0.68	10.2	0.51	0.49	0.08	0.44	0.09
0.29	0.29	0.31	0.69	0.09	0.16	0.07	0.09
0.34	1.89	2.67	1.33	0.07	0.15	0.05	0.04
0.37	4.37	2.78	0.35	0.21	0.06	0.21	0.37
0.19	1.44	1.15	0.51	0.07	0.1	0.06	0.08
0.24	3.06	3.03	0.18	0.27	0.06	0.08	0.07
0.27	0.68	0.48	2.65	0.34	0.74	0.11	0.1
0.28	0.76	1.93	1.83	0.14	0.27	0.42	0.3
0.34	3.3	1.41	1.01	0.51	0.08	0.03	0.11
0.26	10.1	0.9	0.96	0.53	0.12	0.17	0.19
0.3	1.11	1.48	0.26	0.16	0.25	0.68	0.43
0.6	1.93	14.91	0.26	0.19	0.04	0.65	0.1
0.19	2.39	0.41	0.54	6.41	0.05	0.07	0.06
0.27	2.26	1.01	0.44	0.18	0.03	0.06	0.11
0.46	11.42	2.03	0.36	0.19	0.81	0.3	0.08
0.3	1.1	2.57	0.44	0.19	0.09	0.51	0.11
0.66	2.6	5.46	0.06	0.85	0.42	0.92	0.11
0.44	2.73	0.73	0.43	0.13	0.26	0.27	0.11
0.41	1.76	3.52	1.99	0.19	0.12	0.06	0.21
0.28	1	28.07	4.47	0.14	0.06	0.6	0.07
0.27	7.42	1.48	0.18	0.46	1.05	0.07	0.3
0.2	8.04	1.06	2.21	0.16	0.1	0.07	0.05
0.26	1.46	19.27	0.87	0.15	0.07	0.18	0.09
0.3	1.99	5.85	0.19	2.34	0.36	0.04	0.04
0.37	0.87	1.49	1.23	0.2	0.37	0.58	0.15
0.29	2.58	1.7	0.66	0.2	0.17	0.07	0.07
0.54	31.49	6.31	0.57	0.07	0.69	0.73	0.19
0.28	21.62	1.41	0.61	0.13	0.15	0.75	0.17
0.27	4.74	0.49	0.59	0.23	0.36	0.09	0.36
0.31	6.8	1.14	1.23	0.24	0.28	0.13	0.14
0.37	4.51	0.32	3.12	0.08	0.81	0.84	0.04
0.26	4.01	0.3	0.28	0.26	0.08	0.35	0.1
0.44	4.25	0.6	1.36	0.08	0.05	0.07	0.06
0.25	1.11	5.49	0.1	0.34	1.02	0.11	0.03
0.23	6.88	0.43	0.68	0.18	0.05	0.25	0.06
0.25	0.65	4.83	0.7	0.11	0.42	0.32	0.12
0.73	0.92	1.63	1.79	0.29	0.81	0.09	0.04
0.35	0.66	1.17	0.58	0.65	0.13	0.11	0.08
0.24	1.84	0.6	0.72	0.25	0.07	0.28	0.16
0.74	0.51	2.36	0.43	0.11	0.07	0.07	0.04
0.37	2.75	2.02	2.83	0.12	0.68	0.14	0.12
0.27	2.17	1.09	3.11	0.54	3.85	0.24	0.04
1.18	6.87	2.6	0.29	0.17	0.14	0.06	0.05
0.93	4.9	8.48	1.55	0.22	0.1	2.7	0.06
0.3	111.38	3.41	0.33	0.31	0.05	1.13	0.04
	0.72		0.91	0.08	0.32	0.26	0.18
	0.95		2.64	0.32	0.09	0.05	0.09
	4.17		0.54	1.71	0.04	0.21	0.04
	23.47		0.23	0.07	0.05	0.29	0.14
	4.01		0.63	0.24	0.04	0.04	0.04
	2.48		2.31	0.52	0.18	0.04	0.32
	0.54		1.08	0.1	0.04	0.12	0.09
	1.29		0.63	0.16	0.29	0.49	0.18
	17.33		3.56	0.08	0.12	0.05	0.3
	2.85			0.13	0.15	3.94	0.06
	0.31			0.09	0.58	0.21	0.11
	16.55			0.22	0.18	0.11	0.1
	9.69			0.34	0.47	0.12	0.07
	7.66			0.13	0.05	0.05	0.05
	0.51			0.27	0.14	1.02	0.08
	0.71			0.23	0.1	0.85	0.05
	0.83			0.3	2.5	0.43	0.12
	2.87			0.31	0.15	1.68	0.05
	0.58			0.2	0.04	0.17	0.08
	0.6				0.5	0.05	0.28
	0.51				0.1	0.31	0.09
	3.41				0.09	0.09	0.08
	1.41				0.09	0.08	0.07
	3.76				0.09	0.05	0.11
	0.46				0.06	0.09	0.05
	0.49				0.08	0.17	0.04
	0.84				0.05	0.14	0.04
	0.95				2.3	0.11	0.08
	0.42				0.1	0.08	0.04
	0.66				0.05	0.03	0.06
	0.7				0.36	0.08	0.14
	0.49				0.05	0.19	0.05
	9.65				0.07	0.06	0.05
	2.14				0.08	0.15	0.08
					0.05	0.1	0.05
					0.13	0.09	0.05
					0.05	0.43	1.05
					0.5	0.05	0.07
					0.1	0.08	4.44
					0.05	2.39	1.7
					1.27	0.14	0.04
					0.18	0.2	0.12
					0.12	0.06	0.03
					0.13	0.15	0.04
					0.06	0.71	0.04
					0.07	0.13	0.08
					2.22	0.06	0.03
					0.05	0.1	0.07
					0.16	0.05	0.07
					0.19	0.76	0.08
					0.06	2.17	0.06
					0.16	0.19	0.03
					1.33	0.19	0.18
					0.05	0.15	0.18
					0.08	0.4	0.04
					0.05	1.01	0.05
					0.22	0.09	0.07
					0.35	0.06	0.04
					0.22	0.12	0.08
					0.06	0.04	0.1
					0.07	0.5	0.04
					0.14	1.69	0.11
					0.06	0.05	0.09
					0.2	0.05	0.05
					0.11	0.05	0.05
					0.07	0.34	0.04
					0.03	0.05	0.06
					0.67	0.13	0.2
					0.03	0.07	0.06
						0.12	0.06
						0.33	0.04
						0.07	0.06
						0.22	1.31
						0.15	0.17
						0.17	0.05
						0.05	0.1
						0.05	0.04
						0.06	0.12
						0.07	0.04
						0.07	0.1
						0.09	0.06
						0.06	0.68
						0.06	0.05
						0.28	0.46
						0.54	0.03
						0.02	0.17
						0.09	0.04
						0.05	0.07
						0.1	0.05
						0.09	0.27
						0.26	0.08
						0.04	0.07
						0.05	0.1
						0.16	0.05
						0.13	1.26
						0.04	0.64
						0.05	0.13
						0.05	0.26
						0.3	0.07
							0.06
							0.04
							0.09
							0.06
							0.04
							0.07
							0.04
							0.07
							0.07
							0.06

## Sheet: antiS+NP IgG
Pre-V	V1-14d	V1-28d	V2-1m	V2-3m	V2-6m	V2-9m	V2-12m
0.63	15	140.92	10.9	11.67	4.13	5.2	2.77
0.37	3.63	46.32	22.87	10.55	24.8	1.02	4.07
0.05	1.68	148.46	65.26	21.53	3.66	6.53	24.7
1.33	2.9	42.97	19	13.07	13.38	4.14	18.26
0.19	2.01	47.5	29.52	43.73	33.64	1.43	4.34
0.51	1.49	114.15	43.04	84.93	4.86	1.44	6.99
0.15	14.61	54.4	61.68	25.12	2.95	10.09	6.91
0.82	0.49	39.98	102.3	13.02	6.02	6.82	8.45
0.36	1.68	63.99	54.49	45.4	7.86	1.36	0.9
0.6	1.04	53.71	13.89	12.85	13.09	8.61	27.48
0.22	0.57	48.23	32.15	13.88	5.43	2.93	19.89
1.05	2.71	27.57	179.22	6.82	3.72	5.52	7.12
0.21	0.4	121.45	42.19	16.57	0.69	4.23	1.19
0.42	9.99	190.42	146.22	30.02	34.92	4.21	10.71
3.32	2.24	352.59	0.35	34.39	6.38	16.01	7.01
0.36	1.32	74.57	2.84	21.74	0.79	3.77	1.77
0.17	1.84	82.8	35.84	25.7	6.12	3.65	1.95
1.03	7.39	30.9	185.33	29.84	7.66	9.92	7.69
1.68	1.35	72.19	222.71	35.14	6.51	4.29	2.01
0.2	9.69	68.35	18.01	61.94	5.99	19.43	34.08
1.67	2.25	81.25	183.49	18.97	19.87	30.79	1.99
0.57	0.3	28.26	272.01	21.56	7.37	17.75	21.36
0.21	0.59	80.82	202.06	15.58	5.27	13.17	57.7
0.72	3.44	168.39	56.39	17.07	7.61	14.48	4.82
0.77	0.4	30.22	33.88	4.04	8.98	3.74	2.21
0.17	10.38	35.66	60.95	44.37	17.98	7.45	6.83
3.23	0.51	236	100.79	24.19	6.43	3.14	0.78
0.37	1.46	16.68	212.44	51.04	1.52	24.43	1.58
0.35	0.88	43.65	80.62	13.44	10.12	0.46	3.64
0.37	0.55	26.58	60.5	29.51	2.63	2.06	3.29
0.11	0.83	23.58	187.62	8.95	8.13	6.65	2.22
0.19	7.9	0.22	86.69	23.08	11.96	2.04	0.98
1.66	14.26	9.59	82.21	14.54	14.56	17.78	91.59
0.5	0.19	27.83	154.06	37.77	19.16	3.88	0.91
0.47	0.43	122.06	116.67	85.61	24.11	9.99	3.14
0.63	8.02	31.31	143.65	15.72	3.88	2.93	5.93
0.48	1.83	60.4	56.9	17.26	4.91	5.31	1.03
0.2	6.43	19.34	75.49	7.99	5.8	19.54	7.22
0.15	2.95	55.06	72.92	22.77	24.04	1.03	3.3
0.52	0.23	75.05	53.4	64.84	2.21	12.85	6.09
0.43	0.64	58.26	39.3	14.01	13.76	2.6	2.49
0.37	2.07	59.13	23.07	26.44	13.55	31.93	5.34
0.12	2.88	62.29	27.72	13.22	4.92	8.92	7.28
0.53	9.89	38.76	68.61	39.96	8.71	9.17	0.69
0.4	4.09	51.59	25.65	85.55	3.25	3.66	6.25
0.4	0.9	97.03	77.93	64.89	33.89	2.04	10.4
1.09	1.03	3.91	44.95	4.1	5.2	5.81	3.95
0.16	0.43	65.37	84.71	8.11	6.52	3.19	6.84
0.18	2.85	17.23	142.87	33	26.28	2.95	6.61
0.45	1.52	52.97	78.23	15.85	7.68	3.13	5.89
0.35	8.65	38.72	19.34	17.6	18.36	3.68	1.48
0.4	6.46	33.86	36.98	13.21	4.25	25.68	6.4
0.43	1.28	24.48	47.35	6.49	6.53	3.44	3.43
3.11	0.25	25.77	3.52	8.76	3.69	3.65	2.05
0.37	6.92	55.64	68.99	10.9	2.98	0.83	4.95
0.2	0.44	58.93	157.71	21.82	8	3.97	2.01
0.18	1.4	61.96	84.05	19.36	2.63	3.96	1.9
0.43	5.7	71.32	61.21	82.4	4.9	10.3	1.81
0.83	41.32	41.56	35.4	15.23	7.22	144.64	29.93
0.59	3.5	54.37	43.36	12.89	1.34	5.88	2.21
0.52	6.71	51.64	133.88	31.34	5	16.02	1.51
0.35	0.47	24.8	64.63	189.25	8.28	9.6	6.14
0.36	4.77	68.21	46.69	62.22	12.36	6.96	2.45
0.44	1.29	43.18	26.21	47.72	9.95	15.45	4.99
0.72	11.51	87.23	109.64	36.02	3.53	6.6	32.42
0.19	1.56	79.77	62.62	36.73	82.42	9.25	13.54
0.65	4.83	56.31	119.14	30.32	12.66	2.52	1.7
0.16	4.61	129.8	79.03	16.75	17.36	2.29	0.95
0.35	1.67	50.31	138.52	20.58	9.83	3.01	2.02
0.41	1.88	28.37	14.12	40.03	2.24	2.25	6.84
0.97	0.83	42.37	99.8	24.84	19.58	6.51	4.38
0.93	3.69	52.13	158.76	8.42	5.31	8.28	2.34
0.21	0.47	208.02	123.45	20.82	11.33	4.44	2.32
0.51	34.21	22.25	77.92	8.41	7.41	3	5.12
0.52	1.76	13.94	121.44	37.31	3.69	7.9	0.66
0.51	13.47	28.65	68.04	10.89	5.96	3.19	1.45
0.6	6.41	11.52	152.12	19.71	6.24	3.28	2.84
0.19	4.83	40.1	24.8	11.17	2.44	3.78	0.82
0.2	1.27	16.56	74.02	11.73	10.26	1.64	1.38
0.46	1.63	41.92	60.64	4.88	9.51	5.54	0.42
0.11	4.32	28.59	58.71	30.84	1.64	1.46	5.85
0.76	0.79	147.67	12.92	30.38	3.92	43.57	9.18
0.54	3.83	30.56	110.85	28.39	9.14	5.01	2.21
0.48	0.7	27.66	45.38	52.82	2.62	45.61	0.69
0.51	1.46	13.39	52.45	23.28	9.47	3.64	6.2
0.5	1.47	56.51	45.33	25.64	9.47	4.02	1.1
1.28	4.26	94.04	35.74	48.63	1.41	5.75	12.95
0.37	7.39	101.69	83.02	13.96	1.85	6.08	9.6
0.43	1.24	182.09	42.87	8.42	3.39	9.38	4.42
0.5	1.47	86.57	68.73	10.84	1.59	9.12	5.72
0.58	4.77	18.5	177.1	31.65	13.14	0.73	4.24
	0.91		111.05	36.11	11.98	34.96	2
	3.31		55.03	19.1	10.33	6.33	0.67
	0.61		160.3	20.97	1.61	30.99	2.93
	2.44		33.28	30.62	3.05	5.23	5.12
	3.59		27.76	20.19	5.8	1.83	2.4
	1.32		42.26	55.19	9.12	1.83	5.89
	0.72		188.79	62.49	4.27	4.27	3.68
	0.75		33.01	19.51	16.69	5.37	2.01
	1.53		75.83	18.29	7.22	4.76	2.22
	2.23			19.8	13.15	1.3	1.4
	0.58			22.34	14.02	9.6	2.08
	15.76			18.64	23.55	2.22	8.95
	2.85			44.77	11.08	9.53	5.14
	3.5			16.55	6.58	1.1	10.84
	2.2			60.01	3.22	5.49	5.28
	1.26			71.65	3.54	4.73	8.79
	4.07			26.56	7.4	4.16	7.86
	1.99			9.36	4.24	0.85	5.44
	0.95			75.13	2.19	13.96	2.12
	0.69				64.06	0.8	1.44
	0.72				20.65	1.63	0.97
	0.35				4.9	1.23	4.48
	2.55				2.75	6.09	1.12
	3.64				26.55	8.14	3.24
	0.77				22.49	0.68	111.42
	1.58				8.64	5.5	2.17
	0.71				3.02	2.04	7.66
	0.91				23.07	12.36	2.34
	0.5				7.19	17.19	1.24
	1.76				3.73	2.8	2.94
	0.41				23.93	5.21	4.25
	0.98				3.14	7.86	2.14
	1.94				9.79	4.74	6.43
	2.2				4.7	1.4	1.84
					8.34	2.87	13.32
					3.22	2.06	2.4
					5.93	39.69	1.84
					18.25	4	38.43
					7.3	1.67	2.03
					4.85	6.65	4.44
					7.91	3.4	1
					34.92	13.02	1.15
					9.77	7.56	0.43
					2.25	18.16	10.51
					63.8	3.46	0.8
					6.41	2.5	2.9
					27.79	3.64	1.04
					5.28	5.26	0.96
					1.42	7.95	4.92
					5.82	11.09	3.2
					8.64	20.48	7.43
					6.04	15.19	0.35
					2.72	2.8	4.66
					10.86	1.61	1.17
					6.88	3.94	1.51
					12.85	2.09	5.89
					2.1	6.2	8.97
					25.92	2.11	5.56
					21.89	9.15	4.02
					12.9	2.68	1.25
					5.1	16.16	3.93
					12.2	15.38	1.71
					2.91	3.62	2.29
					2.33	4.66	11.18
					6.43	1.76	35.48
					14.33	2.5	1.86
					0.76	1.26	0.76
					18.72	2.19	5.02
					15.16	1.89	6.24
						16.29	1.57
						17.96	1.15
						2.14	10.68
						4.58	16.18
						21.61	2.91
						1.02	1.29
						4.79	0.42
						4.02	10.38
						9.36	10.06
						4	1.24
						86.14	79.46
						4.81	2.2
						4.62	7.59
						14.97	1.11
						39.73	5.3
						10.54	3.19
						7.15	3.7
						7.77	1.57
						5.88	9.06
						4.36	2.19
						1.16	1.77
						16.28	11.12
						8.07	1.4
						29.38	5.28
						5.34	6.96
						5.58	4.48
						5.82	1.38
						1.19	0.76
						4.3	6.02
						15.22	2.74
							1.56
							1.14
							2.2
							0.73
							0.41
							1.78
							1.04
							3.03
							3.08
							2.77

## Sheet: antiRBD IgM
Pre-V	V2-1m	V2-3m	V2-6m	V2-9m	V2-12m
0.07	0.16	0.14	1.09	0.07	0.03
0.05	0.47	0.18	0.31	0.06	0.03
0.06	1.02	0.38	0.24	0.04	0.43
0.04	0.39	0.47	0.56	0.05	0.12
0.05	0.46	0.32	0.94	0.08	0.16
0.07	0.36	0.24	0.56	0.04	0.04
0.13	0.62	0.81	0.37	0.05	0.04
0.04	1.85	0.2	0.27	0.29	0.23
0.09	0.41	0.26	0.71	0.04	0.03
0.15	3.01	0.52	0.44	0.05	0.04
0.13	0.19	0.15	0.38	0.11	0.03
0.04	0.76	0.25	2.47	0.03	0.12
0.03	1.04	0.62	0.3	0.03	0.03
0.06	0.31	0.22	0.36	0.26	0.12
0.13	0.06	0.2	0.54	0.04	0.03
0.05	0.9	0.34	0.35	0.08	0.06
0.09	0.24	0.26	1.03	0.17	0.04
0.04	3.31	0.42	0.53	0.17	0.09
0.04	1.79	0.35	1.01	0.05	0.04
0.04	1.63	0.4	0.52	0.05	0.27
0.03	40.98	0.22	0.74	2.15	0.03
0.03	0.51	0.33	0.4	0.04	0.11
0.05	9.84	0.28	0.49	0.1	0.03
0.05	0.2	0.24	0.66	0.06	0.03
0.05	9.48	0.41	0.55	0.05	0.03
0.04	0.11	0.51	0.63	0.09	0.09
0.04	1.01	0.27	0.59	0.05	0.04
0.04	1.17	0.36	0.52	0.05	0.03
0.03	0.16	0.6	0.52	0.04	0.18
0.04	2.5	2.87	0.56	0.03	0.1
0.04	1.22	0.44	0.63	0.15	0.05
0.05	0.4	0.23	0.81	1.78	0.04
0.03	0.4	0.27	0.53	0.41	0.15
0.03	5.52	0.5	0.56	0.04	0.06
0.23	0.58	0.72	0.72	0.05	0.04
0.07	0.14	0.23	0.46	0.08	0.2
0.04	0.17	0.2	0.66	0.73	0.04
0.03	0.13	0.31	0.93	0.12	0.02
0.04	0.27	0.33	0.7	0.31	0.31
0.04	2.23	1.21	0.57	0.1	0.68
0.04	0.38	0.39	1.11	0.29	0.04
0.03	0.17	0.82	0.67	0.41	0.06
0.69	0.07	0.57	0.55	0.05	0.04
0.04	1.43	0.22	0.46	0.88	0.44
0.18	0.37	0.24	0.48	0.08	0.03
0.03	0.21	0.22	0.56	0.14	0.02
0.13	0.54	1.1	0.72	0.33	0.45
0.04	0.59	0.24	0.47	0.06	0.06
0.04	1	0.27	0.86	0.04	0.05
0.24	0.25	0.72	0.58	0.07	0.12
0.03	0.73	0.35	0.58	0.09	0.1
0.09	0.19	0.45	0.56	0.07	0.07
0.04	3.07	0.24	0.85	0.22	0.06
0.03	0.41	0.3	0.72	0.37	0.03
0.09	0.33	0.59	0.66	0.04	0.42
0.11	0.9	0.51	0.62	0.05	0.09
0.05	0.36	0.37	0.83	1.05	2.1
0.04	0.4	0.32	0.61	0.16	0.52
0.09	0.53	0.67	0.93	0.06	0.1
0.03	0.62	0.53	0.91	0.07	0.04
0.05	0.3	0.26	1.97	0.27	0.11
0.35	0.45	0.52	1.22	0.09	0.3
0.12	0.09	0.83	1.11	0.43	0.06
0.04	0.23	0.23	0.99	0.15	0.07
0.04	3.57	0.4	1.01	0.05	0.05
0.04	12.13	0.65	1.23	0.09	0.02
0.1	0.19	0.55	2.23	0.11	0.14
0.04	3.73	0.25	0.97	0.09	0.04
0.06	1.56	1.12	1.14	0.56	0.11
0.04	0.12	2.6	1.54	0.04	0.03
0.04	1.37	0.24	1.51	0.67	0.16
0.08	1.25	0.49	1.23	0.08	0.05
0.05	0.75	0.24	1.69	0.11	0.05
0.04	1.01	0.47	1.05	1.87	0.47
0.09	1.14	0.59	1.6	0.08	0.24
0.05	1.88	0.81	1.58	0.05	0.16
0.04	3.11	0.35	1.85	0.44	0.06
0.04	0.29	1.04	1.2	0.07	0.05
	3.41	0.38	1.15	0.08	0.23
	0.14	0.57	1.98	0.24	0.03
	0.72	0.27	1.15	0.47	0.16
	0.86	0.34	1.65	0.36	0.05
	1.37	0.41	1.57	0.08	0.06
	0.73	0.37	1.6	0.08	0.06
	0.59	0.67	1.68	0.22	1.09
	0.64	0.29	1.68	0.1	0.04
	2.72	0.32	1.71	0.07	0.18
	2.86	0.58	5.61	0.39	0.05
	0.31	0.36	1.7	0.09	0.02
	1.36	0.43	1.38	4.57	0.07
	0.22	0.48	0.26	0.14	0.06
	0.38	0.3	0.53	0.2	0.13
	3.61	0.25	0.13	0.05	0.43
	0.38	1.22	0.05	0.15	0.04
	0.19	0.3	0.04	0.27	0.05
	0.73	0.32	0.05	0.05	0.04
	1.5	0.53	0.04	0.08	0.07
	1.35	0.25	0.04	0.11	0.06
	0.63	0.43	0.43	0.12	0.07
	8.71	0.35	0.15	0.08	0.08
		0.71	0.1	10.81	0.04
		0.41	0.11	0.28	0.15
		0.28	0.1	0.12	0.2
		0.35	0.05	0.09	0.05
		1.01	0.04	0.04	0.05
		0.35	0.03	0.4	0.08
		0.45	0.04	0.78	0.05
		1.79	0.13	0.05	0.06
		0.6	0.09	0.07	0.04
		1.43	0.04	0.11	0.37
			0.09	0.05	0.15
			0.05	0.17	0.04
			0.05	0.06	0.07
			0.1	0.12	0.04
			0.07	0.34	0.06
			0.29	0.05	0.05
			0.04	0.04	0.03
			0.04	0.1	0.16
			0.07	0.07	0.04
			0.11	0.11	0.03
			0.06	1.44	0.04
			0.06	1.58	0.32
			0.04	1.55	0.03
			0.05	1.94	0.09
			0.04	1.24	0.06
			0.04	1.46	0.03
			0.1	1.61	0.03
			0.05	1.1	0.08
			0.09	1.53	0.05
			0.04	1.55	0.05
			0.14	1.54	3.42
			1.06	1.28	0.05
			0.23	2.11	0.04
			0.05	1.16	0.03
			0.04	1.26	0.03
			0.1	1.35	0.04
			0.07	1.59	0.04
			0.11	1.25	0.03
			0.03	1.75	0.06
			0.04	1.14	0.13
			0.11	1.66	0.13
			0.04	2.09	0.03
			0.04	0.96	0.03
			0.32	1.22	0.04
			0.04	1.36	0.03
			0.07	1.03	0.03
			0.03	1.35	0.05
			0.07	1.49	0.04
			0.11	1.09	0.03
			0.07	1.15	0.12
			0.03	1.23	0.03
			0.06	1.23	0.05
			0.11	1.39	0.05
			0.04	1.28	0.12
			0.14	1.18	0.06
			0.05	1.51	0.07
			0.08	1.45	0.04
			0.05	1.15	0.1
			0.28	1.39	0.15
			0.04	1.18	0.08
				1.17	0.05
				1.45	0.05
				1.35	0.04
				1.22	0.05
				1.24	0.1
				1.22	0.03
				1.42	0.18
				0.98	0.03
				1.21	0.08
				0.94	0.04
				0.92	0.05
				0.86	0.04
				1.19	0.26
				1.67	0.03
				1.22	0.05
				1.24	0.04
				1.01	0.05
				0.95	0.16
				1.01	0.12
				1.07	0.36
				0.87	0.29
				0.86	0.26
				1.11	0.85
				0.96	0.3
				1.17	0.03
				1.15	0.22
				1.09	0.68
				0.89	0.03
				1.38	0.06
				0.94	0.06
					0.22
					0.06
					0.02
					0.24
					0.06
					0.12
					0.05
					0.05
					0.51
					0.19

## Sheet: antiRBD IgG
Pre-V	V2-1m	V2-3m	V2-6m	V2-9m	V2-12m
0.03	67.14	2.35	3.65	3.19	0.55
0.02	66.81	3.28	4.25	4.43	0.52
0.05	64.22	5.42	3.77	1.3	15.78
0.04	60.93	2.67	3.75	0.77	0.11
0.09	57.24	7.83	3.01	1.27	0.14
0.04	55.27	14.54	2.47	0.49	1.09
0.02	50.37	6.64	4.05	0.18	0.23
0.03	46.72	2.47	3.47	4.56	0.32
0.05	45.91	8.64	2.39	1.01	1.15
0.04	45.61	5.38	0.87	0.86	1.12
0.02	44.17	3.89	3.21	0.56	0.51
0.02	42.67	1.99	4.72	0.81	2.24
0.01	41.98	3.89	2.79	0.11	1.28
0.06	39.37	4.4	2.17	1.86	0.6
0.1	37.88	6.66	1.56	1.33	2.63
0.03	34.45	3.4	1.81	0.54	0.39
0.03	31.54	4.75	1.37	0.5	0.51
0.02	29.81	4.86	0.2	6.96	1.06
0.05	29.69	5.57	1.2	1.3	0.1
0.02	29.17	7.12	8.68	0.12	0.68
0.02	27.9	3.43	3.81	0.62	0.48
0.02	27.28	7.35	3.59	1.67	0.54
0.03	27.04	4.79	1.77	0.45	0.61
0.02	25.12	3.26	2.46	0.81	1.26
0.03	24.43	4.19	1.66	0.05	0.93
0.02	23.98	6.02	2.59	0.58	0.43
0.02	23.95	10.36	2.07	0.56	0.2
0.03	22	5.75	1.33	0.38	1.53
0.06	19.48	4.08	2.13	0.32	0.16
0.07	19.26	5.52	2.07	1.25	5.9
0.02	18.78	5.25	0.83	3.56	0.27
0.05	18.74	7.57	1.22	0.11	1
0.58	18.57	3.52	0.26	0.62	0.34
0.02	16.9	6.59	2.92	0.87	0.35
0.02	16.34	17.77	3.69	0.2	1.55
0.03	15.95	3.24	3.23	2.3	24.16
0.03	15.4	2.83	5.07	1.15	1.2
0.02	15.28	2.72	14.06	1.94	3.39
0.03	14.86	3.92	1.07	3.73	1.95
0.02	14.82	10.01	2.69	0.36	2.24
0.02	14.52	4.8	2.48	1.42	0.58
0.03	14.18	3.86	3.51	0.62	1.91
0.02	13.99	4.36	2.4	1.77	2.17
0.03	13.76	4.81	4.26	0.26	0.87
0.03	13.52	12.69	2.75	0.41	1.52
0.02	13.43	11.43	2.49	1.83	1.04
12.14	12.9	5.08	1.8	1.83	0.89
11.95	12.71	2.47	3.35	0.47	0.26
11.8	12.37	6.34	2.02	0.86	0.15
0.02	12.33	3.06	2.78	1.83	1.12
0.07	12.23	3.88	4.13	0.32	0.57
0.04	2.92	1.17	3.45	0.72	0.38
0.02	1.45	3.58	1.44	2.94	1.06
0.02	2.11	1.53	0.39	0.41	0.16
0.02	11.28	2.28	1.7	0.7	0.94
0.41	11.19	5.28	1.94	1.51	0.2
10.03	10.89	3.35	3.33	1.75	0.72
10	10.58	13.38	5.2	1.32	0.07
0.02	10.21	3.95	0.5	0.77	0.44
0.04	10.19	4.07	2.91	0.66	0.38
0.02	10.08	6.22	2.89	0.11	0.67
0.02	44.6	0.87	0.31	2.73	4.64
0.03	7.59	1.46	0.86	0.04	5.14
0.05	9.64	7.22	1.63	1.05	0.07
0.02	9.63	7.86	1.86	0.73	0.48
0.03	9.51	6.2	1.57	1.01	0.14
0.03	9.03	3.09	2.77	0.87	1.91
0.03	8.78	3.93	1.09	1.51	1.47
0.02	8.75	3.01	1.71	1.07	0.3
0.03	8.68	7.18	1.31	0.23	0.7
0.04	8.61	5.4	1.56	12.09	3.91
0.02	8.1	2.39	1.53	1.99	2.58
0.08	7.67	3.54	2.37	0.69	1.38
0.02	7.42	2.14	2.37	1.08	0.92
0.03	7.09	7.5	2.22	1.26	0.68
0.02	6.53	4.72	1.94	0.41	1.25
0.04	6.36	3.66	6.72	0.31	2.06
0.06	6.1	1.76	1.75	0.49	0.76
0.04	6.08	2.43	1.5	1.68	0.46
0.02	5.96	2.46	2.69	1.09	0.58
0.06	5.69	5.67	0.93	4.21	4.06
0.02	5.28	4.71	1.8	0.43	1.07
0.02	5.18	7.79	0.84	0.43	0.81
	4.96	9.22	1.32	0.53	1.31
	4.6	4.76	0.67	0.7	0.14
	4.59	4.81	3.83	1.55	7.23
	4.21	8.52	2.65	5.14	12.12
	3.62	1.95	0.62	0.64	3.85
	3.6	2.62	2.7	2.45	0.34
	3.34	3.07	1.12	0.87	0.89
	3.31	3.85	1.12	3.03	0.73
	2.77	6.52	2.56	37.26	2.11
	2.49	3.06	1.18	1.1	0.44
	2.48	2.76	3.24	0.7	0.25
	1.64	5.82	2.84	0.42	1.12
	1.61	4.28	3.6	0.56	0.37
	1.34	5.36	1.36	10.58	0.42
	0.74	17.79	0.7	0.53	1.74
	0.4	3.28	0.85	0.43	1.26
	0.05	3.22	1.77	2.35	2.21
		3.27	2.26	0.28	1.32
		4.94	2.23	1.89	1.13
		2.38	0.89	0.54	0.92
		8.76	2.01	1.28	1.02
		3.23	1.37	0.25	0.74
		2.21	0.48	1.29	0.32
		3.65	0.74	0.86	0.11
		9.89	1.01	0.97	1.18
		5.06	0.66	0.17	0.23
		3.67	0.7	0.79	0.66
			9.96	0.12	29.3
			3.54	0.38	0.47
			0.83	0.43	1.95
			0.55	1.03	0.4
			3.92	1.94	0.21
			5.77	0.15	1.1
			1.46	0.58	0.73
			0.45	0.4	0.36
			5.63	2.78	1.32
			1.12	1.97	0.86
			0.63	5.36	1.48
			5.04	1.48	0.42
			0.42	2.55	0.47
			1.73	1.49	13.87
			0.97	1.56	0.41
			1.32	1.8	1.13
			0.83	1.2	0.31
			0.88	7.27	0.35
			2.88	1.59	0.08
			1.3	2.65	2.41
			0.57	1.34	0.29
			0.99	1.66	0.72
			5.75	3.73	0.25
			1.17	3.42	0.33
			0.41	3.72	1.19
			11.74	1.7	1.03
			1.27	5.83	2.05
			3.68	4.03	0.13
			0.92	1.41	3.4
			0.22	1.41	0.18
			1.02	2.21	0.69
			1.93	2.62	1.1
			0.74	1.45	2.21
			0.47	3.14	3.96
			1.2	2.75	1.31
			0.91	2.04	0.33
			1.75	4.12	1.54
			0.27	2.6	1.52
			4.68	2.01	0.82
			4.01	1.53	6.97
			2.56	2.38	7.48
			0.8	2.81	0.49
			1.53	3.66	1.34
			0.75	1.53	2.84
			0.47	1.96	2.15
			0.65	7.93	0.52
			2.92	4.04	0.39
			0.1	4.31	4.5
			3.42	1.58	13.27
			3.07	4.64	0.77
				1.08	0.19
				2.41	0.13
				5.45	3.25
				3.05	2.62
				1.16	0.43
				0.69	28.71
				1.3	0.91
				2.53	2.78
				3.4	0.18
				1.55	1.64
				10.15	5.36
				0.94	4.11
				1.75	2
				2.87	7.71
				6.19	1.24
				2.19	0.95
				2.28	3.8
				1.47	1.41
				2.6	1.87
				2.08	1.58
				0.84	1.24
				4.04	0.37
				2.97	0.55
				4.84	1.48
				1.87	0.68
				1.3	0.07
				3.83	0.44
				0.97	0.41
				2.39	0.2
				4.05	0.09
					1.51
					1.21
					0.76
					3.24
					0.76

## Sheet: antiS+NP IgM vs antiRBD IgM
antiS+NP IgM	antiRBD IgM
0.13	0.16
0.17	0.47
3.82	1.02
0.22	0.39
3.26	0.46
0.21	0.36
0.42	0.62
1.18	1.85
0.66	0.41
1.31	3.01
0.19	0.19
0.87	0.76
0.49	1.04
0.4	0.31
0.24	0.06
0.59	0.9
0.34	0.24
1.93	3.31
3.49	1.79
1.34	1.63
17.68	40.98
0.4	0.51
9.1	9.84
0.16	0.2
5.2	9.48
0.1	0.11
1.11	1.01
4.7	1.17
0.12	0.16
1.44	2.5
0.36	1.22
0.53	0.4
0.74	0.4
11.73	5.52
0.43	0.58
0.19	0.14
0.2	0.17
0.12	0.13
0.41	0.27
0.63	2.23
0.35	0.38
0.42	0.17
0.09	0.07
0.62	1.43
0.28	0.37
0.85	0.21
0.51	0.54
0.69	0.59
1.33	1
0.35	0.25
0.51	0.73
0.18	0.19
2.65	3.07
1.83	0.41
1.01	0.33
0.96	0.9
0.26	0.36
0.26	0.4
0.54	0.53
0.44	0.62
0.36	0.3
0.44	0.45
0.06	0.09
0.43	0.23
1.99	3.57
4.47	12.13
0.18	0.19
2.21	3.73
0.87	1.56
0.19	0.12
1.23	1.37
0.66	1.25
0.57	0.75
0.61	1.01
0.59	1.14
1.23	1.88
3.12	3.11
0.28	0.29
1.36	3.41
0.1	0.14
0.68	0.72
0.7	0.86
1.79	1.37
0.58	0.73
0.72	0.59
0.43	0.64
2.83	2.72
3.11	2.86
0.29	0.31
1.55	1.36
0.33	0.22
0.91	0.38
2.64	3.61
0.54	0.38
0.23	0.19
0.63	0.73
2.31	1.5
1.08	1.35
0.63	0.63
3.56	8.71

## Sheet: antiS+NP IgG vs antiRBD Ig G
antiS+NP IgG	antiRBD Ig G
10.9	9.64
22.87	29.17
65.26	9.03
19	1.61
29.52	50.37
43.04	13.76
61.68	11.19
102.3	25.12
54.49	10.08
13.89	4.59
32.15	6.53
179.22	45.91
42.19	10.21
146.22	42.67
0.35	0.05
2.84	0.4
35.84	4.96
185.33	37.88
222.71	31.54
18.01	3.31
183.49	66.81
272.01	67.14
202.06	64.22
56.39	12.9
33.88	10.19
60.95	13.43
100.79	23.95
212.44	46.72
80.62	24.43
60.5	13.52
187.62	57.24
86.69	19.48
82.21	15.95
154.06	60.93
116.67	27.28
143.65	55.27
56.9	12.37
75.49	14.86
72.92	16.34
53.4	13.99
39.3	12.23
23.07	4.21
27.72	8.78
68.61	10.89
25.65	6.1
77.93	6.36
44.95	8.68
84.71	14.82
142.87	14.18
78.23	5.28
19.34	2.48
36.98	5.69
47.35	9.63
3.52	0.74
68.99	18.74
157.71	34.45
84.05	16.9
61.21	10.58
35.4	2.77
43.36	9.51
133.88	18.78
64.63	12.33
46.69	7.09
26.21	3.6
109.64	19.26
62.62	15.28
119.14	27.9
79.03	12.71
138.52	44.17
14.12	1.64
99.8	15.4
158.76	39.37
123.45	23.98
77.92	22
121.44	29.69
68.04	11.28
152.12	27.04
24.8	3.34
74.02	18.57
60.64	10
58.71	10.03
12.92	1.34
110.85	14.52
45.38	8.61
52.45	7.67
45.33	7.42
35.74	2.49
83.02	11.95
42.87	6.08
68.73	8.1
177.1	41.98
111.05	12.14
55.03	8.75
160.3	29.81
33.28	3.62
27.76	4.6
42.26	5.18
188.79	45.61
33.01	5.96
75.83	11.8
