# Supplementary material for: Evaluation of antibody kinetics and durability in healthy individuals vaccinated with inactivated COVID-19 vaccine (CoronaVac): A cross-sectional and cohort study in Zhejiang, China
Source: eLife. 2023 Mar 16;12:e84056. doi: 10.7554/eLife.84056 (PMC10110235; doi:10.7554/eLife.84056)
Supplement: Figure 3—source data 1. [file elife-84056-fig3-data1.xlsx]

## Sheet: neutralising antibody
Pre-V	V-1m	V-3m	V-6m	V-9m	V-12m
2	64	8	12	8	12
2	96	6	16	4	4
2	24	16	2	8	6
2	12	16	32	16	4
4	48	64	48	24	8
4	48	48	8	8	8
4	24	24	8	8	2
2	48	6	24	8	2
2	128	12	16	6	2
4	16	32	8	8	8
2	8	2	8	2	8
4	64	4	12	24	2
2	96	24	6	32	2
2	64	12	24	6	4
4	4	12	12	6	2
2	2	16	2	2	2
2	2	16	12	2	4
2	32	12	8	2	8
2	48	8	6	4	4
2	48	16	2	4	16
2	32	16	12	6	4
2	32	16	6	12	4
2	32	16	8	4	24
2	32	4	24	16	6
2	256	8	12	16	2
2	64	16	8	4	2
2	48	32	6	8	2
2	48	32	8	6	2
2	32	8	4	6	4
2	32	16	2	64	2
2	64	4	16	4	2
2	64	6	6	2	2
2	2	12	16	4	16
2	32	16	16	6	2
2	48	16	8	12	2
2	48	16	4	12	2
2	2	8	8	2	2
2	16	2	4	6	2
2	24	12	32	4	8
2	24	16	8	8	2
2	2	8	16	8	2
2	2	16	16	8	4
2	16	12	8	2	12
2	32	16	12	4	2
2	2	48	12	6	2
4	4	64	16	24	4
2	24	12	6	4	6
2	24	12	16	8	6
2	24	48	24	8	4
4	16	24	12	8	4
4	24	24	24	12	4
2	8	16	12	2	4
2	2	16	16	8	2
2	2	6	12	2	4
2	32	16	6	8	6
2	32	24	16	6	4
2	32	6	8	2	4
2	16	24	6	6	2
2	12	24	12	8	24
2	16	12	4	8	6
2	32	32	12	8	2
4	6	48	16	4	6
4	32	128	24	6	4
2	12	64	6	32	6
2	64	8	2	4	16
2	16	16	32	8	16
2	2	24	24	8	4
2	32	16	24	4	2
2	16	12	8	2	4
2	48	16	12	12	12
2	16	24	24	2	2
2	32	6	4	12	2
2	32	8	16	4	4
2	32	8	16	2	4
2	16	16	8	2	2
2	24	4	12	2	2
2	32	24	16	8	4
2	128	12	6	8	2
2	16	12	8	4	4
2	32	24	24	2	2
2	12	32	2	4	8
2	16	8	8	8	12
2	6	24	4	6	4
2	32	24	8	4	2
2	8	4	6	4	6
2	12	24	4	16	6
2	4	128	2	8	8
2	16	12	8	4	4
2	6	6	8	6	4
2	12	4	6	2	6
	48	12	16	8	2
	64	32	8	2	2
	24	16	8	2	2
	16	8	2	2	6
	32	16	2	2	12
	32	32	8	2	4
	32	8	6	2	4
	32	8	4	12	4
	16	16	4	24	2
	12	4	6	4	4
		16	6	6	2
		8	4	6	2
		16	2	8	4
		64	2	4	4
		8	6	4	2
		16	8	6	6
		8	8	4	4
		64	6	4	6
		16	12	12	2
		32	2	6	2
			16	6	2
			6	4	6
			4	2	6
			2	16	6
			16	4	2
			8	4	32
			8	4	4
			6	4	4
			24	8	4
			12	24	2
			8	4	8
			24	8	4
			4	16	4
			8	6	16
			8	96	6
			12	8	4
			4	4	2
			2	32	2
			12	6	32
			6	6	6
			4	12	8
			2	64	2
			24	2	2
			6	24	2
			2	8	6
			32	12	2
			6	32	4
			24	16	2
			8	8	4
			4	2	4
			2	4	2
			8	8	6
			8	8	6
			2	2	2
			2	8	4
			8	12	4
			8	12	2
			16	12	6
			12	6	6
			6	4	6
			6	6	2
			2	4	12
			8	32	6
			2	24	8
			2	4	16
			8	6	48
			24	6	8
			2	6	8
			16	2	2
			8	6	16
				2	6
				6	6
				2	6
				4	16
				2	4
				8	4
				32	2
				16	2
				4	4
				6	2
				4	8
				24	8
				6	8
				4	4
				2	24
				24	4
				2	6
				4	2
				8	16
				4	2
				2	6
				6	8
				4	4
				4	2
				16	8
				6	2
				4	2
				2	2
				2	4
				2	2
					2
					2
					6
					2
					2
					4
					2
					2
					4
					2

## Sheet: Neutralization inhibition rate 
Pre-V	V-1m	V-3m	V-6m	V-9m	V-12m
0	71.7241	51.4312	49.4347	15.9587	34.1311
0	76.3218	36.4728	52.3124	7.92193	7.90843
0	62.069	68.9751	57.4512	0	69.74
0	42.7586	49.2151	43.2682	9.98852	30.9053
0	89.6552	83.0102	62.5899	14.1217	17.5859
0	80	85.5956	49.8458	2.1814	30.9053
0	81.8391	51.6159	22.5077	27.2101	21.6441
13.11	86.4368	30.94	39.9794	20.5511	25.2862
13.66	86.4368	75.6233	35.4573	16.8772	2.39334
0	59.5402	80.6094	38.5406	45.3502	56.5036
0	61.6092	37.3961	28.6942	30.4248	48.8033
0	92.1839	42.7516	19.5876	28.8175	31.8418
0	75.6322	68.421	26.2887	27.4397	15.9209
2.11	84.3678	67.6824	59.7938	17.1068	44.9532
0	24.3678	79.5014	26.4605	38.4615	14.4641
0	52.8736	75.6233	26.976	29.7359	19.7711
8.89	55.8621	55.8633	35.7388	22.6177	15.0884
0	96.3218	58.8181	42.268	56.372	41.2071
12.19	96.0919	68.421	44.8454	20.5511	36.3163
2.11	78.1609	75.4386	21.9931	61.8829	66.2851
10.36	98.3908	72.1145	66.1512	83.9265	22.7888
0	98.6207	57.3407	57.5601	42.1355	38.8137
0	97.7011	39.9815	35.0515	28.5878	80.8533
0	60.6897	33.1487	46.5636	55.6831	34.3392
15.49	52.6437	28.1625	70.6186	14.8106	18.5224
0	84.1379	56.2327	47.4227	41.217	34.0271
1.37	90.3448	56.048	38.8316	20.4734	56.2955
0	95.6322	58.4487	27.4914	34.4379	22.5806
0	70.8046	61.0342	38.6598	0	61.0822
0	92.1839	76.362	36.0825	16.4497	43.1842
0	98.6207	30.0092	60.4811	30.1775	3.01769
0	82.9885	47.5531	53.4364	8.87574	13.9438
6.51	86.2069	34.6237	58.9347	27.3373	84.1831
0	97.0115	73.5484	78.5223	5.08876	29.6566
0	83.6782	64.086	68.5567	31.5976	6.76379
0	94.4828	48.172	39.8625	19.2899	28.3039
4.31	72.8736	35.0538	70.7904	32.071	0
25.76	81.6092	23.0108	52.5773	51.2426	34.9636
28.14	76.0919	29.6774	69.4158	37.5148	26.3267
0	61.8391	90.7527	31.2715	17.8698	34.8595
0	86.2069	30.5376	47.9381	10.2959	8.7409
0	41.8391	54.4086	71.4777	60	48.0749
0	49.8851	32.2581	60.3093	45.0888	37.3569
0	83.4483	29.6774	17.9	57.8698	10.1977
1.63	75.1328	78.0645	40.378	33.7278	0
0	47.7152	79.1398	58.4192	16.6864	18.2195
0	50.9033	36.129	25.6014	28.7574	8.17805
0	76.6206	21.05	41.5808	29.4675	25.4658
3.26	87.2476	64.9462	51.5464	11.716	26.3975
0	79.8087	38.0645	30.2405	15.0296	34.6791
0.72	53.0287	57.2043	52.7491	3.90532	30.9524
3.44	45.3773	35.4839	49.1409	28.9941	45.7557
0	71.5197	30.5376	38.1443	29.4675	9.93789
0	54.5165	45.8064	27.3196	40.1183	3.00207
0	79.1711	33.3333	32.9875	17.6331	6.72878
0	97.6621	62.3656	45.2282	27.1006	29.089
0	81.2965	48.172	50.6224	43.432	3.93375
11.78	79.3836	68.8172	27.8008	63.5503	24.0166
1.45	73.6451	75.0538	41.9087	81.0651	74.6377
0	48.7779	57.8495	30.7054	18.5799	21.7391
0	83.847	50.9677	32.5726	29.7041	0
2.9	72.7949	94.1936	43.361	55.9763	47.5155
0	80.4463	68.6021	59.751	33.7278	15.4244
0	61.1052	67.957	35.4772	38.4615	34.3685
0	91.7109	73.5484	32.1577	26.3905	74.6377
0	98.2997	62.1505	73.444	32.3077	56.6253
0	85.1222	59.5699	64.9378	15.9763	18.53
0.18	72.5824	66.0215	67.4274	32.5444	4.65838
0	88.5229	60.8602	46.2656	0	0
0	45.1647	89.4624	59.5436	30.4142	10.56
5.43	84.6971	32.28	59.3361	41.8968	33.8509
0	93.1987	42.7957	34.4398	6.60264	56.2112
18.12	99.5749	48.8172	33.61	7.08283	11.4907
0	81.7216	54.1936	5.32	9.96399	14.0787
0	81.084	61.5054	56.2241	45.7383	0
0	85.1222	47.5269	47.7178	15.4862	16.9772
19.93	96.3868	58.6845	73.444	25.8103	24.3271
0	71.5197	35.0463	31.7427	22.2089	0.931677
0	81.084	33.1963	28.0083	14.0456	18.53
0	75.983	33.1963	43.1535	32.2929	0
7.25	67.0563	65.6732	41.2863	35.6543	30.1242
0	60.4676	47.7903	39.2116	76.2305	56.5217
13.77	83.847	67.5231	51.2448	14.5258	12.0083
0	73.22	76.5673	35.8921	57.9832	21.7391
0	61.9554	61.1511	23.444	17.407	46.6874
8.41	58.1296	66.2898	23.444	18.8475	0
1.09	81.9341	75.9507	56.0166	32.7731	34.8861
14.45	74.0701	34.83	83.4025	19.8079	17.1843
10.73	68.7904	39.9794	48.9627	31.3325	0
16.25	72.1145	39.1572	22.4066	78.1513	15.0355
	98.1533	31.69	68.6722	12.365	19.7163
	95.5679	66.7009	31.9502	57.503	0
	85.9649	54.5735	43.9834	20.2881	0
	94.6445	61.1511	49.1701	61.3445	29.2199
	50.1385	63.6177	15.1452	9.2437	10.2128
	61.9575	56.2179	50.8299	6.36254	39.0071
	76.1773	68.7564	44.8133	15.4862	24.2553
	92.2438	75.7451	29.2531	36.1345	29.3617
	68.7904	51.4902	32.8283	27.491	18.8652
	72.6685	37.1018	0	10.9244	18.5816
		52.7235	8.33333	69.7479	0
		67.112	34.8485	24.3697	9.07801
		65.2621	18.9394	21.7287	3.97163
		75.1285	25.5051	28.4514	37.4468
		44.0904	16.1616	16.9268	9.07801
		41.8294	19.9495	37.0948	16.5957
		40.185	0	21.2485	22.4113
		79.6506	15.9091	0	29.2199
		65.0565	31.3131	17.6471	0
		76.3618	28.0303	18.8475	10.7801
			68.4343	34.6939	0
			35.6061	22.6891	11.4894
			14.1414	3.2413	4.53901
			0	0	0
			26.7677	37.1859	0
			57.0707	0	88.9362
			22.9798	18.8442	0
			16.4141	0	17.7305
			56.8182	45.2261	0
			49.7475	29.8995	10.922
			32.8283	17.0854	27.0922
			36.6162	8.54271	2.41135
			2.52525	17.5879	0
			3.28283	20.1005	39.7163
			37.6263	2.26131	6.09929
			42.9293	24.1206	0
			0	7.53769	0
			27.0202	68.3417	0.851064
			43.9394	28.8945	94.6099
			20.4546	7.78895	14.7518
			4.54545	13.0653	92.9078
			29.798	4.27136	0
			50.7576	29.6482	0
			26.0101	7.53769	0
			30.5556	20.8543	39.5078
			83.3333	68.3417	0
			0	57.5377	0
			54.2929	36.6834	0
			21.4646	30.6533	0
			17.6768	14.0703	17.3575
			19.4444	34.9246	48.3161
			42.6768	29.6482	21.114
			7.92193	27.1357	0
			0.114811	38.6935	2.20207
			20.3215	19.3467	0
			21.24	5.77889	18.2643
			39.8393	10.5528	37.0466
			27.2101	17.3367	18.7824
			48.1056	10.0503	27.2021
			41.4466	21.8593	11.9171
			28.8175	14.0703	0
			21.9288	39.4472	32.2539
			37.0838	48.2412	28.6269
			15.0402	14.5729	10.8808
			18.7141	28.392	43.5233
			20.3215	57.2864	81.6062
			19.403	25.1256	0
			0	9.29648	19.8187
			43.054	31.6708	30.4404
			25.3731	46.6334	51.1658
				0	0
				8.4788	30.3109
				1.24688	17.487
				0.249377	68.6529
				0	1.29534
				0	0
				10.4738	2.46114
				0	39.7668
				7.23192	51.4249
				40.8978	0
				75.3117	67.6166
				36.409	40.6736
				2.99252	26.1658
				36.409	0.777202
				48.76	47.5389
				32.419	0
				5.48628	36.2866
				21.6958	0
				15.4613	57.1335
				30.1746	8.79479
				35.1621	19.2182
				48.6284	49.1857
				21.4464	42.9316
				50.3741	45.4072
				19.202	28.8599
				16.4589	30.5538
				32.1696	40.5863
				13.4663	0
				28.6783	27.04
				36.6583	53.0945
					27.8176
					17.6547
					30.1629
					9.31596
					0
					34.5928
					37.4593
					20.2606
					55.0489
					9.83713

## Sheet: correlation 
Neutralization inhibition rate of pseudovirus (%)	anti S+N IgM		Neutralization inhibition rate of pseudovirus (%)	anti RBD IgM		Neutralization inhibition rate of pseudovirus (%)	anti S+N IgG		Neutralization inhibition rate of pseudovirus (%)	anti RBD IgG		Neutralising antibody to live SARS-CoV-2 (Log2)	anti S+N IgM		Neutralising antibody to live SARS-CoV-2 (Log2)	anti RBD IgM		Neutralising antibody to live SARS-CoV-2 (Log2)	anti S+N IgG		Neutralising antibody to live SARS-CoV-2 (Log2)	anti RBD IgG		Neutralising antibody to live SARS-CoV-2 (Log2)	Neutralization inhibition rate of pseudovirus (%)
71.72	0.13		71.72	0.16		71.72	9.64		71.72	9.64		6	0.13		6	0.16		6	10.9		6	9.64		6	71.72
76.32	0.17		76.32	0.47		76.32	29.17		76.32	29.17		6.58	0.17		6.58	0.47		6.58	22.87		6.58	29.17		6.58	76.32
62.07	3.82		62.07	1.02		62.07	9.03		62.07	9.03		4.58	3.82		4.58	1.02		4.58	65.26		4.58	9.03		4.58	62.07
42.76	0.22		42.76	0.39		42.76	1.61		42.76	1.61		3.58	0.22		3.58	0.39		3.58	19		3.58	1.61		3.58	42.76
89.66	3.26		89.66	0.46		89.66	50.37		89.66	50.37		5.58	3.26		5.58	0.46		5.58	29.52		5.58	50.37		5.58	89.66
80	0.21		80	0.36		80	13.76		80	13.76		5.58	0.21		5.58	0.36		5.58	43.04		5.58	13.76		5.58	80
81.84	0.42		81.84	0.62		81.84	11.19		81.84	11.19		4.58	0.42		4.58	0.62		4.58	61.68		4.58	11.19		4.58	81.84
86.44	1.18		86.44	1.85		86.44	25.12		86.44	25.12		5.58	1.18		5.58	1.85		5.58	102.3		5.58	25.12		5.58	86.44
86.44	0.66		86.44	0.41		86.44	10.08		86.44	10.08		7	0.66		7	0.41		7	54.49		7	10.08		7	86.44
59.54	1.31		59.54	3.01		59.54	4.59		59.54	4.59		4	1.31		4	3.01		4	13.89		4	4.59		4	59.54
61.61	0.19		61.61	0.19		61.61	6.53		61.61	6.53		3	0.19		3	0.19		3	32.15		3	6.53		3	61.61
92.18	0.87		92.18	0.76		92.18	45.91		92.18	45.91		6	0.87		6	0.76		6	179.22		6	45.91		6	92.18
75.63	0.49		75.63	1.04		75.63	10.21		75.63	10.21		6.58	0.49		6.58	1.04		6.58	42.19		6.58	10.21		6.58	75.63
84.37	0.4		84.37	0.31		84.37	42.67		84.37	42.67		6	0.4		6	0.31		6	146.22		6	42.67		6	84.37
24.37	0.24		24.37	0.06		24.37	0.05		24.37	0.05		2	0.24		2	0.06		2	0.35		2	0.05		2	24.37
52.87	0.59		52.87	0.9		52.87	0.4		52.87	0.4		1	0.59		1	0.9		1	2.84		1	0.4		1	52.87
55.86	0.34		55.86	0.24		55.86	4.96		55.86	4.96		1	0.34		1	0.24		1	35.84		1	4.96		1	55.86
96.32	1.93		96.32	3.31		96.32	37.88		96.32	37.88		5	1.93		5	3.31		5	185.33		5	37.88		5	96.32
96.09	3.49		96.09	1.79		96.09	31.54		96.09	31.54		5.58	3.49		5.58	1.79		5.58	222.71		5.58	31.54		5.58	96.09
78.16	1.34		78.16	1.63		78.16	3.31		78.16	3.31		5.58	1.34		5.58	1.63		5.58	18.01		5.58	3.31		5.58	78.16
98.39	17.68		98.39	40.98		98.39	66.81		98.39	66.81		5	17.68		5	40.98		5	183.49		5	66.81		5	98.39
98.62	0.4		98.62	0.51		98.62	67.14		98.62	67.14		5	0.4		5	0.51		5	272.01		5	67.14		5	98.62
97.7	9.1		97.7	9.84		97.7	64.22		97.7	64.22		5	9.1		5	9.84		5	202.06		5	64.22		5	97.7
60.69	0.16		60.69	0.2		60.69	12.9		60.69	12.9		5	0.16		5	0.2		5	56.39		5	12.9		5	60.69
52.64	5.2		52.64	9.48		52.64	10.19		52.64	10.19		8	5.2		8	9.48		8	33.88		8	10.19		8	52.64
84.14	0.1		84.14	0.11		84.14	13.43		84.14	13.43		6	0.1		6	0.11		6	60.95		6	13.43		6	84.14
90.34	1.11		90.34	1.01		90.34	23.95		90.34	23.95		5.58	1.11		5.58	1.01		5.58	100.79		5.58	23.95		5.58	90.34
95.63	4.7		95.63	1.17		95.63	46.72		95.63	46.72		5.58	4.7		5.58	1.17		5.58	212.44		5.58	46.72		5.58	95.63
70.8	0.12		70.8	0.16		70.8	24.43		70.8	24.43		5	0.12		5	0.16		5	80.62		5	24.43		5	70.8
92.18	1.44		92.18	2.5		92.18	13.52		92.18	13.52		5	1.44		5	2.5		5	60.5		5	13.52		5	92.18
98.62	0.36		98.62	1.22		98.62	57.24		98.62	57.24		6	0.36		6	1.22		6	187.62		6	57.24		6	98.62
82.99	0.53		82.99	0.4		82.99	19.48		82.99	19.48		6	0.53		6	0.4		6	86.69		6	19.48		6	82.99
86.21	0.74		86.21	0.4		86.21	15.95		86.21	15.95		1	0.74		1	0.4		1	82.21		1	15.95		1	86.21
97.01	11.73		97.01	5.52		97.01	60.93		97.01	60.93		5	11.73		5	5.52		5	154.06		5	60.93		5	97.01
83.68	0.43		83.68	0.58		83.68	27.28		83.68	27.28		5.58	0.43		5.58	0.58		5.58	116.67		5.58	27.28		5.58	83.68
94.48	0.19		94.48	0.14		94.48	55.27		94.48	55.27		5.58	0.19		5.58	0.14		5.58	143.65		5.58	55.27		5.58	94.48
72.87	0.2		72.87	0.17		72.87	12.37		72.87	12.37		1	0.2		1	0.17		1	56.9		1	12.37		1	72.87
81.61	0.12		81.61	0.13		81.61	14.86		81.61	14.86		4	0.12		4	0.13		4	75.49		4	14.86		4	81.61
76.09	0.41		76.09	0.27		76.09	16.34		76.09	16.34		4.58	0.41		4.58	0.27		4.58	72.92		4.58	16.34		4.58	76.09
61.84	0.63		61.84	2.23		61.84	13.99		61.84	13.99		4.58	0.63		4.58	2.23		4.58	53.4		4.58	13.99		4.58	61.84
86.21	0.35		86.21	0.38		86.21	12.23		86.21	12.23		1	0.35		1	0.38		1	39.3		1	12.23		1	86.21
41.84	0.42		41.84	0.17		41.84	4.21		41.84	4.21		1	0.42		1	0.17		1	23.07		1	4.21		1	41.84
49.89	0.09		49.89	0.07		49.89	8.78		49.89	8.78		4	0.09		4	0.07		4	27.72		4	8.78		4	49.89
83.45	0.62		83.45	1.43		83.45	10.89		83.45	10.89		5	0.62		5	1.43		5	68.61		5	10.89		5	83.45
75.13	0.28		75.13	0.37		75.13	6.1		75.13	6.1		1	0.28		1	0.37		1	25.65		1	6.1		1	75.13
47.72	0.85		47.72	0.21		47.72	6.36		47.72	6.36		2	0.85		2	0.21		2	77.93		2	6.36		2	47.72
50.9	0.51		50.9	0.54		50.9	8.68		50.9	8.68		4.58	0.51		4.58	0.54		4.58	44.95		4.58	8.68		4.58	50.9
76.62	0.69		76.62	0.59		76.62	14.82		76.62	14.82		4.58	0.69		4.58	0.59		4.58	84.71		4.58	14.82		4.58	76.62
87.25	1.33		87.25	1		87.25	14.18		87.25	14.18		4.58	1.33		4.58	1		4.58	142.87		4.58	14.18		4.58	87.25
79.81	0.35		79.81	0.25		79.81	5.28		79.81	5.28		4	0.35		4	0.25		4	78.23		4	5.28		4	79.81
53.03	0.51		53.03	0.73		53.03	2.48		53.03	2.48		4.58	0.51		4.58	0.73		4.58	19.34		4.58	2.48		4.58	53.03
45.38	0.18		45.38	0.19		45.38	5.69		45.38	5.69		3	0.18		3	0.19		3	36.98		3	5.69		3	45.38
71.52	2.65		71.52	3.07		71.52	9.63		71.52	9.63		1	2.65		1	3.07		1	47.35		1	9.63		1	71.52
54.52	1.83		54.52	0.41		54.52	0.74		54.52	0.74		1	1.83		1	0.41		1	3.52		1	0.74		1	54.52
79.17	1.01		79.17	0.33		79.17	18.74		79.17	18.74		5	1.01		5	0.33		5	68.99		5	18.74		5	79.17
97.66	0.96		97.66	0.9		97.66	34.45		97.66	34.45		5	0.96		5	0.9		5	157.71		5	34.45		5	97.66
81.3	0.26		81.3	0.36		81.3	16.9		81.3	16.9		5	0.26		5	0.36		5	84.05		5	16.9		5	81.3
79.38	0.26		79.38	0.4		79.38	10.58		79.38	10.58		4	0.26		4	0.4		4	61.21		4	10.58		4	79.38
73.65	0.54		73.65	0.53		73.65	2.77		73.65	2.77		3.58	0.54		3.58	0.53		3.58	35.4		3.58	2.77		3.58	73.65
48.78	0.44		48.78	0.62		48.78	9.51		48.78	9.51		4	0.44		4	0.62		4	43.36		4	9.51		4	48.78
83.85	0.36		83.85	0.3		83.85	18.78		83.85	18.78		5	0.36		5	0.3		5	133.88		5	18.78		5	83.85
72.79	0.44		72.79	0.45		72.79	12.33		72.79	12.33		2.58	0.44		2.58	0.45		2.58	64.63		2.58	12.33		2.58	72.79
80.45	0.06		80.45	0.09		80.45	7.09		80.45	7.09		5	0.06		5	0.09		5	46.69		5	7.09		5	80.45
61.11	0.43		61.11	0.23		61.11	3.6		61.11	3.6		3.58	0.43		3.58	0.23		3.58	26.21		3.58	3.6		3.58	61.11
91.71	1.99		91.71	3.57		91.71	19.26		91.71	19.26		6	1.99		6	3.57		6	109.64		6	19.26		6	91.71
98.3	4.47		98.3	12.13		98.3	15.28		98.3	15.28		4	4.47		4	12.13		4	62.62		4	15.28		4	98.3
85.12	0.18		85.12	0.19		85.12	27.9		85.12	27.9		1	0.18		1	0.19		1	119.14		1	27.9		1	85.12
72.58	2.21		72.58	3.73		72.58	12.71		72.58	12.71		5	2.21		5	3.73		5	79.03		5	12.71		5	72.58
88.52	0.87		88.52	1.56		88.52	44.17		88.52	44.17		4	0.87		4	1.56		4	138.52		4	44.17		4	88.52
45.16	0.19		45.16	0.12		45.16	1.64		45.16	1.64		5.58	0.19		5.58	0.12		5.58	14.12		5.58	1.64		5.58	45.16
84.7	1.23		84.7	1.37		84.7	15.4		84.7	15.4		4	1.23		4	1.37		4	99.8		4	15.4		4	84.7
93.2	0.66		93.2	1.25		93.2	39.37		93.2	39.37		5	0.66		5	1.25		5	158.76		5	39.37		5	93.2
99.57	0.57		99.57	0.75		99.57	23.98		99.57	23.98		5	0.57		5	0.75		5	123.45		5	23.98		5	99.57
81.72	0.61		81.72	1.01		81.72	22		81.72	22		5	0.61		5	1.01		5	77.92		5	22		5	81.72
81.08	0.59		81.08	1.14		81.08	29.69		81.08	29.69		4	0.59		4	1.14		4	121.44		4	29.69		4	81.08
85.12	1.23		85.12	1.88		85.12	11.28		85.12	11.28		4.58	1.23		4.58	1.88		4.58	68.04		4.58	11.28		4.58	85.12
96.39	3.12		96.39	3.11		96.39	27.04		96.39	27.04		5	3.12		5	3.11		5	152.12		5	27.04		5	96.39
71.52	0.28		71.52	0.29		71.52	3.34		71.52	3.34		7	0.28		7	0.29		7	24.8		7	3.34		7	71.52
81.08	1.36		81.08	3.41		81.08	18.57		81.08	18.57		4	1.36		4	3.41		4	74.02		4	18.57		4	81.08
75.98	0.1		75.98	0.14		75.98	10		75.98	10		5	0.1		5	0.14		5	60.64		5	10		5	75.98
67.06	0.68		67.06	0.72		67.06	10.03		67.06	10.03		3.58	0.68		3.58	0.72		3.58	58.71		3.58	10.03		3.58	67.06
60.47	0.7		60.47	0.86		60.47	1.34		60.47	1.34		4	0.7		4	0.86		4	12.92		4	1.34		4	60.47
83.85	1.79		83.85	1.37		83.85	14.52		83.85	14.52		2.58	1.79		2.58	1.37		2.58	110.85		2.58	14.52		2.58	83.85
73.22	0.58		73.22	0.73		73.22	8.61		73.22	8.61		5	0.58		5	0.73		5	45.38		5	8.61		5	73.22
61.96	0.72		61.96	0.59		61.96	7.67		61.96	7.67		3	0.72		3	0.59		3	52.45		3	7.67		3	61.96
58.13	0.43		58.13	0.64		58.13	7.42		58.13	7.42		3.58	0.43		3.58	0.64		3.58	45.33		3.58	7.42		3.58	58.13
81.93	2.83		81.93	2.72		81.93	2.49		81.93	2.49		2	2.83		2	2.72		2	35.74		2	2.49		2	81.93
74.07	3.11		74.07	2.86		74.07	11.95		74.07	11.95		4	3.11		4	2.86		4	83.02		4	11.95		4	74.07
68.79	0.29		68.79	0.31		68.79	6.08		68.79	6.08		2.58	0.29		2.58	0.31		2.58	42.87		2.58	6.08		2.58	68.79
72.11	1.55		72.11	1.36		72.11	8.1		72.11	8.1		3.58	1.55		3.58	1.36		3.58	68.73		3.58	8.1		3.58	72.11
98.15	0.33		98.15	0.22		98.15	41.98		98.15	41.98		5.58	0.33		5.58	0.22		5.58	177.1		5.58	41.98		5.58	98.15
95.57	0.91		95.57	0.38		95.57	12.14		95.57	12.14		6	0.91		6	0.38		6	111.05		6	12.14		6	95.57
85.96	2.64		85.96	3.61		85.96	8.75		85.96	8.75		4.58	2.64		4.58	3.61		4.58	55.03		4.58	8.75		4.58	85.96
94.64	0.54		94.64	0.38		94.64	29.81		94.64	29.81		4	0.54		4	0.38		4	160.3		4	29.81		4	94.64
50.14	0.23		50.14	0.19		50.14	3.62		50.14	3.62		5	0.23		5	0.19		5	33.28		5	3.62		5	50.14
61.96	0.63		61.96	0.73		61.96	4.6		61.96	4.6		5	0.63		5	0.73		5	27.76		5	4.6		5	61.96
76.18	2.31		76.18	1.5		76.18	5.18		76.18	5.18		5	2.31		5	1.5		5	42.26		5	5.18		5	76.18
92.24	1.08		92.24	1.35		92.24	45.61		92.24	45.61		5	1.08		5	1.35		5	188.79		5	45.61		5	92.24
68.79	0.63		68.79	0.63		68.79	5.96		68.79	5.96		4	0.63		4	0.63		4	33.01		4	5.96		4	68.79
72.67	3.56		72.67	8.71		72.67	11.8		72.67	11.8		3.58	3.56		3.58	8.71		3.58	75.83		3.58	11.8		3.58	72.67

## Sheet: Sheet2
假病毒	IgM1
71.72	0.16
76.32	0.47
62.07	1.02
42.76	0.39
89.66	0.46
80	0.36
81.84	0.62
86.44	1.85
86.44	0.41
59.54	3.01
61.61	0.19
92.18	0.76
75.63	1.04
84.37	0.31
24.37	0.06
52.87	0.9
55.86	0.24
96.32	3.31
96.09	1.79
78.16	1.63
98.39	40.98
98.62	0.51
97.7	9.84
60.69	0.2
52.64	9.48
84.14	0.11
90.34	1.01
95.63	1.17
70.8	0.16
92.18	2.5
98.62	1.22
82.99	0.4
86.21	0.4
97.01	5.52
83.68	0.58
94.48	0.14
72.87	0.17
81.61	0.13
76.09	0.27
61.84	2.23
86.21	0.38
41.84	0.17
49.89	0.07
83.45	1.43
75.13	0.37
47.72	0.21
50.9	0.54
76.62	0.59
87.25	1
79.81	0.25
53.03	0.73
45.38	0.19
71.52	3.07
54.52	0.41
79.17	0.33
97.66	0.9
81.3	0.36
79.38	0.4
73.65	0.53
48.78	0.62
83.85	0.3
72.79	0.45
80.45	0.09
61.11	0.23
91.71	3.57
98.3	12.13
85.12	0.19
72.58	3.73
88.52	1.56
45.16	0.12
84.7	1.37
93.2	1.25
99.57	0.75
81.72	1.01
81.08	1.14
85.12	1.88
96.39	3.11
71.52	0.29
81.08	3.41
75.98	0.14
67.06	0.72
60.47	0.86
83.85	1.37
73.22	0.73
61.96	0.59
58.13	0.64
81.93	2.72
74.07	2.86
68.79	0.31
72.11	1.36
98.15	0.22
95.57	0.38
85.96	3.61
94.64	0.38
50.14	0.19
61.96	0.73
76.18	1.5
92.24	1.35
68.79	0.63
72.67	8.71
