# Supplementary material for: Evaluation of antibody kinetics and durability in healthy individuals vaccinated with inactivated COVID-19 vaccine (CoronaVac): A cross-sectional and cohort study in Zhejiang, China
Source: eLife. 2023 Mar 16;12:e84056. doi: 10.7554/eLife.84056 (PMC10110235; doi:10.7554/eLife.84056)
Supplement: Figure 4—source data 1. [file elife-84056-fig4-data1.xlsx]

## Sheet: neutralising antibody
Pre-V	V2-1m	V2-3m	V2-6m	V3-1m
4	6	12	2	64
2	16	6	2	768
2	96	24	2	512
2	96	12	2	96
2	128	16	2	512
2	96	12	12	512
2	32	16	4	384
2	12	16	8	128
8	24	8	2	64
2	48	8	2	192
2	8	8	2	64
2	24	12	2	384
2	16	8	4	384
2	12	8	4	64
2	24	8	12	128
2	8	24	24	1024
2	48	16	4	128
2	16	12	2	128
2	16	16	4	128
2	48	12	2	256
2	16	12	6	512
2	24		2	256
4	32	16	4	512
2	12	4	2	32
2	8	8	2	64
2	4	12	2	96
2	64	16	4	256
2	16	6	4	192
2	24	12	4	192
2	12	32	2	128
2	16	16	16	768
2	48	8	8	96
2	32	16	6	96
2	24	12	8	192
2	32	12	2	192
2	48	24	12	128
2	48	16	12	256
2	32	24	8	192
2	32	32	12	256
2	32	6	8	128
2	64	24	12	256
2	96	24	32	256
2	12	6	2	64
2	32	16	12	512
2	48	24	12	256
2	64	96	64	768
2	96	24	32	384
2	192	24	6	256
2	48	32	12	192
2	32	32	24	192
2	32	16	16	32
2	32	96	32	768
2	64	24	16	192
2	48	32	16	192
8	16	64	48	128
2	64	24	2	96
6	96	12	6	256
2	16	24	16	256
2	32	48	8	192
2			24	192
2	24	16	8	24
2	32	64	16	128
2	24	48	16	256
2	48	12	2	256
2	16	12	2	384
2	24	24	4	64
2	128	8	4	32
2	12	12	6	128
2	12	16	6	64
2	48	12	6	128
2	24	8	6	512
2	32	32	16	384
2	32	2	4	24
2	48	4	4	24
2	24	12	12	128
2	24	12	8	64
2	16	32	8	768
2	32	24	12	128
2	16	2	2	96
2	32	6	16	128
2	32	6	8	256
2	48	24	48	256
2	48	12	2	32
2	32	12	4	128
2	32	16	4	16
2	32	24	48	256
2	24	24	8	256
2	16	24	16	192
2	48	48	16	192
2	16	32	8	192

## Sheet: Neutralization inhibition rate 
Pre-V	V2-1m	V2-3m	V2-6m	V3-1m
0	62.89	42.11	0	92.87
0	44.77	24.47	0	98.11
1.45	76.14	49.83	18.38	97.69
0	50.96	22.54	7.65	63.1
0	86.89	53.14	3.25	97.06
0	76.87	61.27	49.34	98.82
0	75.35	39.35	2.02	97.2
18.12	81.3	60.85	29.11	91.89
0	43.21	54.65	39.14	59.47
0	71.33	44.73	14.16	95.43
19.93	47.37	19.09	0	87.91
0	82.13	56.31	35.97	98.82
0	60.8	19.92	7.48	95.43
13.77	42.52	4.2	8.88	65.81
0	80.47	40.32	14.16	73.47
8.41	74.65	48.04	43.54	99.56
1.09	87.95	40.59	35.8	89.39
14.45	49.03	19.78	0	93.52
16.25	73.55	45.14	27.18	96.61
27.68	83.1	55.88	15.04	88.95
8.03	96.4	51	22.96	99.71
5.97	74.65		15.22	98.53
18.18	60.25	31.19	8.53	99.41
35.65	40.86	10.61	0	28.81
29.99	66.44	45.85	5.36	79.66
9.83	59.4	39.29	3.43	68.75
24.47	92.29	53.64	8.18	93.96
0	56.43	30.68	10.29	86.59
11.5	47.5	35.69	0	80.99
11.2	70.09	43.79	0	70.08
5.72	78.93	43.04	32.87	96.86
0	63.72	29.11	19.36	77.78
0	87.13	56.34	13.8	68.55
5.85	74.4	41.37	36.64	88.68
0.32	72.93	9.56	1.69	81.13
11.21	64.3	27.86	31.28	78.2
6.85	91.66	63.62	54.52	98.95
0.32	82.3	59.88	55.31	80.29
0	90.64	35.97	27.9	89.31
0	64.74	23.7	5.22	82.39
0	73.52	38.67	4.55	92.87
0	74.1	54.47	35.63	98.74
0	49.3	30.56	7.44	62.26
19.03	66.9	35.97	29.41	99.55
8.39	72.49	40.54	5.88	90
0.32	86.87	58	28.52	96.59
14.41	79.47	42.83	32.74	91.59
0	84.36	55.09	29.63	80
3.4	94.41	53.01	33.85	78.64
0	72.35	32.25	21.64	92.05
22.36	74.16	32.01	14.76	56.14
3.01	86.31	65.77	34.07	98.86
22.61	93.3	63.45	43.17	95
0	72.35	20.37	28.97	97.5
32.48	92.18	75.09	64.71	93.18
7.62	66.76	15.48	26.53	69.93
13.26	65.08	39.23	13.43	81.87
0	87.71	40.16	19.42	97.49
0	70.39	33.18	27.86	91.01
0	74.3	26.43	16.98	92.19
0.54				91.45
9.96	73.04	41.09	22.97	40.01
27.88	89.25	80.68	56.27	92.19
0.85	63.27	72.6	26.32	99.41
0	91.09	51.25	0.35	82.76
5.17	61.61	41.61	0	97.64
2.55	88.17	58.97	38.48	79.07
10.12	68.98	56.4	17.19	80.69
8.26	77.04	65.28	14.85	81.87
10.27	78.23	59.87	15.56	68.61
18.76	51.67	32.01	3.39	58.59
0	71.55	43.26	23.04	99.26
7.18	89.89	65.26	26.32	99.47
7.64	32.82	12.32	0	36.82
5.17	59.04	30.36	0.82	56.56
0	67.95	40.94	16.96	85.7
21.85	52.7	41.27	23.74	58.28
23.86	83.2	60.13	12.51	99.34
3.78	96.92	79.98	43.39	91.92
0.69	52.19	32.67	34.04	83.05
23.55	70.52	42.1	25.61	45.96
12.12	70.01	44.58	4.09	91.66
12.74	76.52	66.42	38.25	89.4
21.54	65.72	31.68	31.23	59.34
11.74	81.49	49.38	32.87	55.5
16.47	81.32	56.66	62.11	94.83
12.21	94.34	72.21	18.36	92.58
19.46	83.38	57.32	18.6	94.97
1.78	94.55	67.57	54.5	98.97
24.02	84.5	41.16	19.3	98.97

## Sheet: anti S+N IgG
Pre-V	V2-1m	V2-3m	V2-6m	V3-1m
0.63	63.67	18.44	0.49	154.88
0.37	33.73	5.15	0.15	238.62
0.05	113.23	21.93	0.32	177.46
1.33	48.19	7.04	0.21	53.42
0.19	182.39	26.05	0.41	179.48
0.51	34.79	11.49	0.24	175.64
0.15	54.79	15.18	0.32	207.88
0.82	61.13	28.41	0.71	151.88
0.36	12.45	9.18	0.71	21.54
0.6	50.35	8.41	0.1	133.46
0.22	17.17	3.23	0.08	63.74
1.05	105.35	14.08	0.31	327.03
0.21	20.95	4.54	0.25	140.32
0.42	38.84	20.4	0.51	79.29
3.32	33.9	5.16	0.2	48.77
0.36	43.83	9.56	0.73	326.2
0.17	145.64	34.24	0.49	149.21
1.03	31.09	13.38	0.26	210.85
1.68	21.16	6.65	0.39	193.31
0.2	134.75	17.94	0.35	76.48
1.67	102.06	10.44	0.69	275.91
0.57	54.39		0.19	172.02
0.21	22.99	10	0.26	361.63
0.72	1.44	0.81	0.03	5.93
0.77	32.89	4.42	0.34	73.55
0.17	14.28	5.04	0.37	44.7
3.23	104.55	17.02	0.73	160.99
0.37	18.63	3.98	0.62	94.22
0.35	32.96	8.5	0.54	85.04
0.37	27.21	12.76	0.22	28.76
0.11	75.87	38.45	13.66	188.34
0.19	36.93	14.71	4.79	68.34
1.66	77.35	50.11	9.93	64.29
0.5	39.34	23.92	12.69	44.36
0.47	63.39	14.53	4.48	67.58
0.63	32.24	4.55	1.11	94.98
0.48	133.86	37.17	17.59	223.74
0.2	20.07	13.03	4.78	25.06
0.15	51.77	14.24	7.06	109.59
0.52	36.41	22.25	4.98	129.96
0.43	77.06	23.89	22.16	191.58
0.37	54.02	12.6	5.79	201.93
0.12	11.96	9.1	4.04	30.29
0.53	38.79	12.04	7.58	91.13
0.4	107.52	52.24	27.68	143.68
0.4	84.79	18.79	9.68	171.2
1.09	67.06	35.63	22.16	132.33
0.16	80.99	43.27	18.73	103.91
0.18	157.46	44.93	12.82	121.89
0.45	134.3	56.46	17.27	116.04
0.35	22.49	15.4	5.79	34.54
0.4	205.36	143.85	97.96	333.33
0.43	115.15	32.03	18.38	143.43
3.11	116.55	30.13	4.77	215.44
0.37	141.71	126.92	88.67	112.58
0.2	58.28	25.91	5.01	45.58
0.18	66.18	19.27	5.33	107
0.43	105.85	22.09	7.97	114.49
0.83	69.54	24.27	17.98	136.01
0.59	126.27	45.61	20.86	205.32
0.52			26.89	130.3
0.35	30.32	9.41	4.82	17.68
0.36	60.8	31.6	11.85	149.52
0.44	49.25	44.31	15.76	244.22
0.72	25.4	20.62	6.46	120.97
0.19	69.76	14.4	4.55	200.98
0.65	28.63	58.85	18.58	134.12
0.16	200.99	13.89	4.32	48.81
0.35	51.04	19.72	5.54	80.79
0.41	37.15	37.5	11.95	50.99
0.97	47.87	17.73	6.62	74.19
0.93	136.99	20.42	6.24	310.42
0.21	24.6	63.93	11.59	274.05
0.51	19.23	4.12	1.1	22.51
0.52	96.4	1.96	0.86	35.81
0.51	138.55	17.55	6.56	27.59
0.6	69.1	13.29	8.96	45.26
0.19	20.48	15.27	7.06	244.45
0.2	53.3	65.17	18.15	140.38
0.46	6.74	8.18	19.77	95.13
0.11	86.73	7.14	2.39	53.56
0.76	26.82	45.87	29.97	171.17
0.54	173.28	20.73	13.12	94.24
0.48	74.17	7.74	3.71	67.3
0.51	47.21	15.99	4.68	42.68
0.5	19.3	36.57	34.47	135.94
1.28	54.78	43.68	14.4	138.92
0.37	82.73	32.27	8.98	186.97
0.43	139.92	48.79	15.26	118.83
0.5	60.68	20.2	10.21	179.23
0.58

## Sheet: anti RBD IgG
Pre-V	V2-1m	V2-3m	V2-6m	V3-1m
0.03	3.57	2.55	4.81	29.26
0.02	3.4	0.79	1.38	51.69
0.05	6.8	1.94	5.16	46.4
0.04	4.45	0.92	2.51	9.07
0.09	13.85	3.69	3.35	31.03
0.04	3.37	1.27	4.73	27.47
0.02	9.94	1.71	7.18	30.43
0.03	9.38	3.17	13.64	25.86
0.05	4.78	1.32	13.32	2.75
	4.78	1.15	1.53	15.95
0.04	4.35	0.57	1.17	9.4
0.02	11.44	1.92	3.83	53.56
	2.06	0.6	2	34.96
0.02	7.68	1.8	9.9	23.92
0.01	4.37	0.75	2.27	5.56
0.06	3.16	1.29	6.67	58.55
0.1	8.06	2.51	4.54	18.64
	2.9	1.88	3.37	21.49
0.03	2.02	0.8	2.49	35.6
0.03	12.51	1.97	3.65	19
0.02	5.83	1.23	7.11	50.57
0.05	4.53		3.62	34.35
0.02	1.81	0.66	3.6	58.77
0.02	4.69	0.2	0.27	0.7
0.02	3.24	0.74	2.94	8.46
0.03	6.23	1.33	2.03	9.61
0.02	21.52	3.43	5.93	25.81
0.03	4.86	1.1	1.66	12.64
0.02	7.51	1.95	3.32	15.11
0.02	4.4	0.55	3.99	3.49
0.03	6.89	2.62	3.07	29.96
0.06	4.97	1.2	0.53	12.4
	9.59	2.45	0.98	18.64
0.07	2.98	1.42	1.22	8.41
0.02	4.35	1.33	0.84	11.27
0.05	3.43	0.5	0.66	12.4
0.58	9.94	4.7	1.9	23.94
0.02	1.98	0.94	1.09	3.13
0.02	5.11	1.26	0.96	12.93
0.03	3.63	0.99	0.53	8.95
	8.23	4.15	1.59	23.28
0.03	5.36	1.49	1.14	33.46
0.02	1.72	0.44	0.73	3.51
0.03	2.7	1.11	2.31	19.81
0.02	7.24	2.67	1.51	20.92
0.02	19.26	2.34	1.96	2.67
0.03	7.79	2.66	3.66	4.62
0.02	7.56	2.56	1.59	8.29
0.03	13.92	3.84	3.1	6.16
0.03	14.42	6.63	1.7	65.84
0.02	3.69	1.16	0.7	27.31
	41.72	24.02	6.51	17.54
	21.46	2.97	3.25	8.95
	9.03	2.4	2.05	31.12
0.02	16.43	7.27	5.82	17.27
0.07	3.47	1.66	1.22	4.79
0.04	7.81	1.6	0.42	15.89
0.02	20.4	2.31	1.47	19.61
0.02	9.17	1.8	1.71	15.74
0.02	23.85	6.26	3.09	21.03
0.41			3.58	11.62
	8.14	1.46	0.49	1.42
	15.28	4.13	1.68	9.97
0.02	11.67	5.54	2.09	32.59
0.04	4.63	2.43	2.68	13.49
0.02	12.7	1.38	1.76	40.05
0.02	3.82	6.88	1.48	16.89
0.03	32.9	2.67	1.52	4.61
	3.99	2.35	1.11	11.55
0.05	8.61	5.28	1.51	11.41
	6.65	2.53	2.05	10.71
	25.22	3.87	2.31	80.25
	4.58	7.72	1.48	56.57
	3.85	1.02	3.31	4.57
0.02	22.79	0.36	0.75	4.15
0.03	34.29	4.45	2.18	7.1
0.03	14.43	2.14	2.19	7.47
0.03	3.28	3.49	2.22	64.07
	18.03	9.51	2.21	33.22
	2.73	1.5	3.06	25.78
0.02	11.93	1.59	1.38	10.03
0.03	4.27	4.55	2.73	42.76
	14.43	2.05	2.66	16.7
0.04	9.26	1.44	1.52	10.53
	12.17	2.83	2.01	7.27
0.02	2.56	5.98	3.67	31.29
0.08	6.11	5.57	2.84	31.93
	25.46	2.62	1.89	19.04
0.02	20.34	4.5	2.56	21.4
0.03	9	2.24	1.9	34.35
0.02
0.04
0.06
0.04
0.02
0.06
0.02
0.02
