# Supplementary material for: Evaluation of antibody kinetics and durability in healthy individuals vaccinated with inactivated COVID-19 vaccine (CoronaVac): A cross-sectional and cohort study in Zhejiang, China
Source: eLife. 2023 Mar 16;12:e84056. doi: 10.7554/eLife.84056 (PMC10110235; doi:10.7554/eLife.84056)
Supplement: Figure 5—source data 1. [file elife-84056-fig5-data1.xlsx]

## Sheet: Neutralization inhibition rate 
PreV-WT	V2-1m-WT	V2-1m-Delta	V2-1m-Omicron	V3-1m-WT	V3-1m-WT	V3-1m-Delta	V3-1m-Omicron
0	62.89	15.13	0	0	92.87	16.32	0
0	44.77	23.16	0	0	98.11	72.54	30.16
1.45	76.14	19.95	0	18.38	97.69	59.61	0
0	50.96	8.46	0	7.65	63.1	0	0
0	86.89	47.99	0	3.25	97.06	83.2	0
0	76.87	26.29	0	49.34	98.82	48.44	0
0	75.35	19.96	0	2.02	97.2	16.84	21.7
18.12	81.3	36.03	0	29.11	91.89	5.22	0
0	43.21	0.49	0	39.14	59.47	0	0
0	71.33	26.78	0	14.16	95.43	61.25	0
19.93	47.37	13.05	0	0	87.91	26.68	0
0	82.13	20.45	0	35.97	98.82	91.65	55.43
0	60.8	13.44	0	7.48	95.43	0	15.54
13.77	42.52	10.61	0	8.88	65.81	0	0
0	80.47	58.91	0	14.16	73.47	0	0
8.41	74.65	23.56	0	43.54	99.56	84.8	0
1.09	87.95	47.22	0	35.8	89.39	31.45	0
14.45	49.03	10.22	0	0	93.52	5.51	0
16.25	73.55	13.63	0	27.18	96.61	4.92	25.22
27.68	83.1	28.14	0	15.04	88.95	58.57	0
8.03	96.4	64.07	0	22.96	99.71	96.13	0
5.97	74.65	42.75	0	15.22	98.53	72.58	18.18
18.18	60.25	6.33	0	8.53	99.41	95.53	19.65
35.65	40.86	0	0	0	28.81	0	0
29.99	66.44	47.47	0	5.36	79.66	17.14	0
9.83	59.4	23.97	0	3.43	68.75	0	0
24.47	92.29	38.54	0	8.18	93.96	39.79	0
0	56.43	14.92	0	10.29	86.59	16.24	0
11.5	47.5	14.1	0	0	80.99	0	0
11.2	70.09	24.68	0	0	70.08	0	0
5.72	78.93	22.21	0	32.87	96.86	36.35	0
0	63.72	27.35	0	19.36	77.78	12.76	0
0	87.13	57.35	0	13.8	68.55	1.45	0
5.85	74.4	31.32	0	36.64	88.68	40.87	0
0.32	72.93	20.15	0	1.69	81.13	21.81	0
11.21	64.3	26.91	0	31.28	78.2	28.59	0
6.85	91.66	37.21	0.43	54.52	98.95	73.18	0
0.32	82.3	44.56	0	55.31	80.29	30.53	0
0	90.64	38.38	0	27.9	89.31	42.16	0
0	64.74	10.59	0	5.22	82.39	21.49	0
0	73.52	25.15	0	4.55	92.87	51.21	0
0	74.1	25.88	0	35.63	98.74	84.81	0
0	49.3	8.47	0	7.44	62.26	0	0
19.03	66.9	20.77	0	29.41	99.55	93.16	0
8.39	72.49	34.56	0	5.88	90	15.81	0
0.32	86.87	22.13	0	28.52	96.59	76.07	15.89
14.41	79.47	28.96	0	32.74	91.59	56.41	0
0	84.36	31.28	0	29.63	80	0	0
3.4	94.41	59.29	0	33.85	78.64	0	0
0	72.35	30.05	0	21.64	92.05	52.14	0
22.36	74.16	15.3	0	14.76	56.14	0	0
3.01	86.31	39.48	0	34.07	98.86	78.21	0
22.61	93.3	80.6	0	43.17	95	58.97	3.14
0	72.35	30.87	0	28.97	97.5	54.7	0
32.48	92.18	21.58	7.8	64.71	93.18	10.68	0
7.62	66.76	6.15	0	26.53	69.93	0	0
13.26	65.08	15.16	0	13.43	81.87	17.14	0
0	87.71	19.26	2.96	19.42	97.49	29.06	0
0	70.39	15.3	0	27.86	91.01	23.99	0
0	74.3	18.85	0	16.98	92.19	46.94	0
0.54					91.45	6.71	0
9.96	73.04	3.69	0	22.97	40.01	0	0
27.88	89.25	19.81	0	56.27	92.19	22.8	0
0.85	63.27	4.23	0	26.32	99.41	98.81	46.63
0	91.09	78.74	0	0.35	82.76	28.46	0
5.17	61.61	24.78	0	0	97.64	72.88	9.97
2.55	88.17	67.8	0	38.48	79.07	57.97	14.96
10.12	68.98	29.81	0	17.19	80.69	27.87	0
8.26	77.04	43.14	0	14.85	81.87	46.94	0
10.27	78.23	80.88	0	15.56	68.61	37.41	0
18.76	51.67	10.19	0	3.39	58.59	0	0
0	71.55	8.55	0	23.04	99.26	96.13	16.72
7.18	89.89	42.64	0	26.32	99.47	86.38	7.44
7.64	32.82	5.41	0	0	36.82	0	0
5.17	59.04	10.06	0	0.82	56.56	0	0
0	67.95	29.81	0	16.96	85.7	33.93	0
21.85	52.7	20.38	0	23.74	58.28	0	0
23.86	83.2	47.55	2.89	12.51	99.34	97.32	19.72
3.78	96.92	87.55	0	43.39	91.92	35.27	0
0.69	52.19	9.94	0	34.04	83.05	48.21	0
23.55	70.52	8.93	0	25.61	45.96	0	0
12.12	70.01	38.62	2.47	4.09	91.66	81.25	0
12.74	76.52	26.29	0	38.25	89.4	21.65	0
21.54	65.72	15.09	0	31.23	59.34	0	0
11.74	81.49	31.32	22.15	32.87	55.5	0	0
16.47	81.32	43.65	0	62.11	94.83	66.29	0
12.21	94.34	66.42	0	18.36	92.58	55.58	0
19.46	83.38	23.77	0.89	18.6	94.97	37.5	0
1.78	94.55	15.85	0	54.5	98.97	32.94	0
24.02	84.5	25.82	0	19.3	98.97	80.33	69.79
