# Supplementary material for: Evaluation of antibody kinetics and durability in healthy individuals vaccinated with inactivated COVID-19 vaccine (CoronaVac): A cross-sectional and cohort study in Zhejiang, China
Source: eLife. 2023 Mar 16;12:e84056. doi: 10.7554/eLife.84056 (PMC10110235; doi:10.7554/eLife.84056)
Supplement: Table 1—source data 1. [file elife-84056-table1-data1.xlsx]

## Sheet: V-12m
Pre-V				V1-14d				V1-28d				V2-1m				V2-3m				V2-6m				V2-9m				V2-12m
number	sex	age	nation	number	sex	age	nation	number	sex	age	nation	number	sex	age	nation	number	sex	age	nation	number	sex	age	nation	number	sex	age	nation	number	sex	age	nation
1	2	47	ethnic Han	1	2	46.6402	ethnic Han	1	2	47	ethnic Han	1	2	31	ethnic Han	1	1	53	ethnic Han	1	2	21	ethnic Han	1	2	31	ethnic Han	1	1	30	ethnic Han
2	2	45	ethnic Han	2	2	30.725	ethnic Han	2	2	45	ethnic Han	2	1	29	ethnic Han	2	1	58	ethnic Han	2	2	38	ethnic Han	2	1	25	ethnic Han	2	2	25	ethnic Han
3	2	47	ethnic Han	3	2	30	ethnic Han	3	2	47	ethnic Han	3	1	31	ethnic Han	3	2	44	ethnic Han	3	1	31	ethnic Han	3	1	26	ethnic Han	3	2	36	ethnic Han
4	2	38	ethnic Han	4	2	43	ethnic Han	4	2	38	ethnic Han	4	2	39	ethnic Han	4	2	47	ethnic Han	4	2	26	ethnic Han	4	2	28	ethnic Han	4	1	35	ethnic Han
5	2	27	ethnic Han	5	2	39	ethnic Han	5	2	27	ethnic Han	5	2	27	ethnic Han	5	2	42	ethnic Han	5	2	24	ethnic Han	5	1	35	ethnic Han	5	2	36	ethnic Han
6	2	48	ethnic Han	6	2	37	ethnic Han	6	2	48	ethnic Han	6	1	30	ethnic Han	6	2	45	ethnic Han	6	2	29	ethnic Han	6	2	38	ethnic Han	6	2	28	ethnic Han
7	2	37	ethnic Han	7	2	37	ethnic Han	7	2	37	ethnic Han	7	2	28	ethnic Han	7	2	53	ethnic Han	7	2	38	ethnic Han	7	2	37	ethnic Han	7	2	36	ethnic Han
8	2	56	ethnic Han	8	2	39	ethnic Han	8	2	56	ethnic Han	8	1	32	ethnic Han	8	2	55	ethnic Han	8	2	41	ethnic Han	8	2	40	ethnic Han	8	2	28	ethnic Han
9	2	29	ethnic Han	9	1	27	ethnic Han	9	2	29	ethnic Han	9	2	33	ethnic Han	9	2	42	ethnic Han	9	2	20	ethnic Han	9	1	41	ethnic Han	9	2	36	ethnic Han
10	1	40	ethnic Han	10	2	48.7606	ethnic Han	10	1	40	ethnic Han	10	1	36	ethnic Han	10	1	57	ethnic Han	10	2	36	ethnic Han	10	1	27	ethnic Han	10	2	37	ethnic Han
11	1	28	ethnic Han	11	2	37.3187	ethnic Han	11	1	28	ethnic Han	11	1	28	ethnic Han	11	1	55	ethnic Han	11	2	26	ethnic Han	11	2	29	ethnic Han	11	2	39	ethnic Han
12	1	29	ethnic Han	12	2	37.1409	ethnic Han	12	1	29	ethnic Han	12	2	34	ethnic Han	12	1	47	ethnic Han	12	2	22	ethnic Han	12	1	31	ethnic Han	12	2	34	ethnic Han
13	2	38	ethnic Han	13	2	32.9029	ethnic Han	13	2	38	ethnic Han	13	1	32	ethnic Han	13	2	42	ethnic Han	13	2	25	ethnic Han	13	1	30	ethnic Han	13	1	34	ethnic Han
14	2	33	ethnic Han	14	1	34.1313	ethnic Han	14	2	33	ethnic Han	14	1	24	ethnic Han	14	2	50	ethnic Han	14	2	27	ethnic Han	14	2	23	ethnic Han	14	2	25	ethnic Han
15	1	36	ethnic Han	15	2	38.1313	ethnic Han	15	1	36	ethnic Han	15	2	23	ethnic Han	15	2	46	ethnic Han	15	2	27	ethnic Han	15	2	32	ethnic Han	15	2	40	ethnic Han
16	2	43	ethnic Han	16	1	28.4049	ethnic Han	16	2	43	ethnic Han	16	2	26	ethnic Han	16	2	42	ethnic Han	16	2	28	ethnic Han	16	1	24	ethnic Han	16	2	26	ethnic Han
17	1	34	ethnic Han	17	2	25.5513	ethnic Han	17	1	34	ethnic Han	17	2	39	ethnic Han	17	2	40	ethnic Han	17	1	24	ethnic Han	17	2	34	ethnic Han	17	1	39	ethnic Han
18	2	28	ethnic Han	18	1	56	ethnic Han	18	2	28	ethnic Han	18	1	30	ethnic Han	18	1	44	ethnic Han	18	2	23	ethnic Han	18	2	22	ethnic Han	18	2	33	ethnic Han
19	2	35	ethnic Han	19	1	47	ethnic Han	19	2	35	ethnic Han	19	1	26	ethnic Han	19	2	42	ethnic Han	19	2	37	ethnic Han	19	2	24	ethnic Han	19	2	22	ethnic Han
20	2	38	ethnic Han	20	1	50	ethnic Han	20	2	38	ethnic Han	20	2	33	ethnic Han	20	2	44	ethnic Han	20	1	26	ethnic Han	20	2	35	ethnic Han	20	2	29	ethnic Han
21	1	27	ethnic Han	21	2	54	ethnic Han	21	1	27	ethnic Han	21	1	28	ethnic Han	21	2	52	ethnic Han	21	2	29	ethnic Han	21	2	27	ethnic Han	21	2	38	ethnic Han
22	2	48	ethnic Han	22	2	47	ethnic Han	22	2	48	ethnic Han	22	2	33	ethnic Han	22	2	43	ethnic Han	22	1	29	ethnic Han	22	2	33	ethnic Han	22	1	36	ethnic Han
23	1	45	ethnic Han	23	1	46	ethnic Han	23	1	45	ethnic Han	23	2	32	ethnic Han	23	1	41	ethnic Han	23	1	31	ethnic Han	23	2	22	ethnic Han	23	2	36	ethnic Han
24	2	36	ethnic Han	24	2	49	ethnic Han	24	2	36	ethnic Han	24	1	33	ethnic Han	24	1	58	ethnic Han	24	2	22	ethnic Han	24	2	30	ethnic Han	24	2	39	ethnic Han
25	1	50	ethnic Han	25	2	41	ethnic Han	25	1	50	ethnic Han	25	1	34	ethnic Han	25	2	58	ethnic Han	25	2	29	ethnic Han	25	2	41	ethnic Han	25	1	31	ethnic Han
26	2	26	ethnic Han	26	1	29	ethnic Han	26	2	26	ethnic Han	26	1	27	ethnic Han	26	2	58	ethnic Han	26	2	22	ethnic Han	26	2	26	ethnic Han	26	2	34	ethnic Han
27	2	26	ethnic Han	27	1	48	ethnic Han	27	2	26	ethnic Han	27	1	26	ethnic Han	27	1	58	ethnic Han	27	2	23	ethnic Han	27	2	23	ethnic Han	27	2	34	ethnic Han
28	1	46	ethnic Han	28	2	40	ethnic Han	28	1	46	ethnic Han	28	2	38	ethnic Han	28	1	44	ethnic Han	28	1	24	ethnic Han	28	2	38	ethnic Han	28	2	28	ethnic Han
29	1	28	ethnic Han	29	2	37	ethnic Han	29	1	28	ethnic Han	29	2	28	ethnic Han	29	1	42	ethnic Han	29	1	26	ethnic Han	29	2	25	ethnic Han	29	2	28	ethnic Han
30	1	34	ethnic Han	30	2	50	ethnic Han	30	1	34	ethnic Han	30	2	28	ethnic Han	30	1	58	ethnic Han	30	1	34	ethnic Han	30	1	31	ethnic Han	30	2	40	ethnic Han
31	2	43	ethnic Han	31	2	48	ethnic Han	31	2	43	ethnic Han	31	2	30	ethnic Han	31	2	57	ethnic Han	31	2	31	ethnic Han	31	2	20	ethnic Han	31	2	33	ethnic Han
32	1	38	ethnic Han	32	2	54	ethnic Han	32	1	38	ethnic Han	32	1	32	ethnic Han	32	1	57	ethnic Han	32	2	39	ethnic Han	32	2	22	ethnic Han	32	2	29	ethnic Han
33	1	40	ethnic Han	33	1	27	ethnic Han	33	1	40	ethnic Han	33	1	27	ethnic Han	33	1	55	ethnic Han	33	2	32	ethnic Han	33	2	25	ethnic Han	33	2	38	ethnic Han
34	2	52	ethnic Han	34	1	58	ethnic Han	34	2	52	ethnic Han	34	2	33	ethnic Han	34	2	58	ethnic Han	34	2	35	ethnic Han	34	2	31	ethnic Han	34	2	32	ethnic Han
35	2	48	ethnic Han	35	2	52	ethnic Han	35	2	48	ethnic Han	35	2	26	ethnic Han	35	1	56	ethnic Han	35	2	33	ethnic Han	35	2	29	ethnic Han	35	1	34	ethnic Han
36	2	50	ethnic Han	36	2	41	ethnic Han	36	2	50	ethnic Han	36	2	27	ethnic Han	36	1	55	ethnic Han	36	2	41	ethnic Han	36	2	41	ethnic Han	36	2	39	ethnic Han
37	2	46	ethnic Han	37	2	28	ethnic Han	37	2	46	ethnic Han	37	2	35	ethnic Han	37	2	57	ethnic Han	37	2	31	ethnic Han	37	2	37	ethnic Han	37	1	34	ethnic Han
38	1	51	ethnic Han	38	2	40	ethnic Han	38	1	51	ethnic Han	38	1	32	ethnic Han	38	1	58	ethnic Han	38	2	34	ethnic Han	38	1	25	ethnic Han	38	2	39	ethnic Han
39	2	39	ethnic Han	39	1	40	ethnic Han	39	2	39	ethnic Han	39	2	40	ethnic Han	39	1	58	ethnic Han	39	1	25	ethnic Han	39	1	30	ethnic Han	39	2	31	ethnic Han
40	2	52	ethnic Han	40	1	50	ethnic Han	40	2	52	ethnic Han	40	1	37	ethnic Han	40	2	58	ethnic Han	40	1	40	ethnic Han	40	1	32	ethnic Han	40	2	39	ethnic Han
41	2	40	ethnic Han	41	2	29	ethnic Han	41	2	40	ethnic Han	41	1	39	ethnic Han	41	1	57	ethnic Han	41	1	29	ethnic Han	41	1	33	ethnic Han	41	2	34	ethnic Han
42	2	42	ethnic Han	42	2	38	ethnic Han	42	2	42	ethnic Han	42	1	32	ethnic Han	42	1	54	ethnic Han	42	1	34	ethnic Han	42	1	31	ethnic Han	42	2	36	ethnic Han
43	1	38	ethnic Han	43	2	38	ethnic Han	43	1	38	ethnic Han	43	1	30	ethnic Han	43	1	56	ethnic Han	43	1	33	ethnic Han	43	1	34	ethnic Han	43	2	28	ethnic Han
44	1	40	ethnic Han	44	1	31	ethnic Han	44	1	40	ethnic Han	44	2	27	ethnic Han	44	2	56	ethnic Han	44	1	30	ethnic Han	44	2	39	ethnic Han	44	2	32	ethnic Han
45	1	47	ethnic Han	45	1	56	ethnic Han	45	1	47	ethnic Han	45	1	31	ethnic Han	45	2	59	ethnic Han	45	1	32	ethnic Han	45	1	34	ethnic Han	45	2	35	ethnic Han
46	2	49	ethnic Han	46	1	57	ethnic Han	46	2	49	ethnic Han	46	2	35	ethnic Han	46	2	56	ethnic Han	46	1	31	ethnic Han	46	1	27	ethnic Han	46	1	31	ethnic Han
47	2	50	ethnic Han	47	1	40	ethnic Han	47	2	50	ethnic Han	47	1	39	ethnic Han	47	1	56	ethnic Han	47	1	39	ethnic Han	47	2	31	ethnic Han	47	2	32	ethnic Han
48	1	45	ethnic Han	48	1	50	ethnic Han	48	1	45	ethnic Han	48	1	32	ethnic Han	48	2	55	ethnic Han	48	1	35	ethnic Han	48	1	39	ethnic Han	48	2	42	ethnic Han
49	1	50	ethnic Han	49	1	25	ethnic Han	49	1	50	ethnic Han	49	2	35	ethnic Han	49	1	58	ethnic Han	49	1	32	ethnic Han	49	1	23	ethnic Han	49	2	34	ethnic Han
50	2	33	ethnic Han	50	2	48	ethnic Han	50	2	33	ethnic Han	50	2	34	ethnic Han	50	2	59	ethnic Han	50	1	32	ethnic Han	50	1	33	ethnic Han	50	2	39	ethnic Han
51	1	46	ethnic Han	51	2	37	ethnic Han	51	1	46	ethnic Han	51	2	52	ethnic Han	51	1	45	ethnic Han	51	1	37	ethnic Han	51	1	30	ethnic Han	51	2	24	ethnic Han
52	1	48	ethnic Han	52	1	48	ethnic Han	52	1	48	ethnic Han	52	2	59	ethnic Han	52	1	45	ethnic Han	52	1	32	ethnic Han	52	1	32	ethnic Han	52	2	25	ethnic Han
53	2	48	ethnic Han	53	1	52	ethnic Han	53	2	48	ethnic Han	53	2	58	ethnic Han	53	1	52	ethnic Han	53	2	25	ethnic Han	53	2	23	ethnic Han	53	1	24	ethnic Han
54	2	52	ethnic Han	54	2	38	ethnic Han	54	2	52	ethnic Han	54	2	47	ethnic Han	54	1	54	ethnic Han	54	1	33	ethnic Han	54	2	22	ethnic Han	54	2	25	ethnic Han
55	2	46	ethnic Han	55	2	38	ethnic Han	55	2	46	ethnic Han	55	2	55	ethnic Han	55	1	49	ethnic Han	55	1	39	ethnic Han	55	1	32	ethnic Han	55	1	26	ethnic Han
56	2	49	ethnic Han	56	2	30	ethnic Han	56	2	49	ethnic Han	56	2	42	ethnic Han	56	1	34	ethnic Han	56	2	39	ethnic Han	56	1	35	ethnic Han	56	1	26	ethnic Han
57	1	51	ethnic Han	57	2	39	ethnic Han	57	1	51	ethnic Han	57	2	48	ethnic Han	57	2	27	ethnic Han	57	2	33	ethnic Han	57	1	31	ethnic Han	57	1	25	ethnic Han
58	2	31	ethnic Han	58	2	30	ethnic Han	58	2	31	ethnic Han	58	2	50	ethnic Han	58	1	39	ethnic Han	58	1	23	ethnic Han	58	2	34	ethnic Han	58	2	26	ethnic Han
59	1	39	ethnic Han	59	2	40	ethnic Han	59	1	39	ethnic Han	59	1	59	ethnic Han	59	2	36	ethnic Han	59	1	36	ethnic Han	59	1	27	ethnic Han	59	2	25	ethnic Han
60	2	36	ethnic Han	60	2	34	ethnic Han	60	2	36	ethnic Han	60	1	54	ethnic Han	60	1	28	ethnic Han	60	1	32	ethnic Han	60	1	32	ethnic Han	60	2	27	ethnic Han
61	2	29	ethnic Han	61	2	41	ethnic Han	61	2	29	ethnic Han	61	2	58	ethnic Han	61	2	30	ethnic Han	61	1	33	ethnic Han	61	1	30	ethnic Han	61	2	27	ethnic Han
62	1	24	ethnic Han	62	2	35	ethnic Han	62	1	24	ethnic Han	62	2	47	ethnic Han	62	1	37	ethnic Han	62	2	25	ethnic Han	62	2	26	ethnic Han	62	2	34	ethnic Han
63	2	29	ethnic Han	63	2	37	ethnic Han	63	2	29	ethnic Han	63	2	54	ethnic Han	63	2	39	ethnic Han	63	2	26	ethnic Han	63	2	23	ethnic Han	63	2	28	ethnic Han
64	1	26	ethnic Han	64	2	49	ethnic Han	64	1	26	ethnic Han	64	2	50	ethnic Han	64	2	36	ethnic Han	64	2	22	ethnic Han	64	2	40	ethnic Han	64	2	29	ethnic Han
65	2	34	ethnic Han	65	2	38	ethnic Han	65	2	34	ethnic Han	65	2	50	ethnic Han	65	2	26	ethnic Han	65	1	31	ethnic Han	65	1	37	ethnic Han	65	2	39	ethnic Han
66	1	29	ethnic Han	66	2	38	ethnic Han	66	1	29	ethnic Han	66	1	50	ethnic Han	66	2	26	ethnic Han	66	1	27	ethnic Han	66	2	31	ethnic Han	66	2	31	ethnic Han
67	2	38	ethnic Han	67	2	33	ethnic Han	67	2	38	ethnic Han	67	2	46	ethnic Han	67	1	26	ethnic Han	67	2	38	ethnic Han	67	1	33	ethnic Han	67	1	31	ethnic Han
68	1	44	ethnic Han	68	1	31	ethnic Han	68	1	44	ethnic Han	68	1	47	ethnic Han	68	1	31	ethnic Han	68	1	34	ethnic Han	68	1	39	ethnic Han	68	2	34	ethnic Han
69	2	31	ethnic Han	69	2	33	ethnic Han	69	2	31	ethnic Han	69	2	40	ethnic Han	69	2	29	ethnic Han	69	2	39	ethnic Han	69	1	33	ethnic Han	69	1	35	ethnic Han
70	2	32	ethnic Han	70	2	38	ethnic Han	70	2	32	ethnic Han	70	1	46	ethnic Han	70	1	28	ethnic Han	70	1	29	ethnic Han	70	1	32	ethnic Han	70	2	35	ethnic Han
71	2	45	ethnic Han	71	2	23	ethnic Han	71	2	45	ethnic Han	71	2	59	ethnic Han	71	2	39	ethnic Han	71	2	39	ethnic Han	71	2	32	ethnic Han	71	2	35	ethnic Han
72	2	36	ethnic Han	72	2	45	ethnic Han	72	2	36	ethnic Han	72	2	52	ethnic Han	72	2	34	ethnic Han	72	2	36	ethnic Han	72	1	37	ethnic Han	72	2	36	ethnic Han
73	2	28	ethnic Han	73	2	23	ethnic Han	73	2	28	ethnic Han	73	2	53	ethnic Han	73	1	35	ethnic Han	73	2	31	ethnic Han	73	2	25	ethnic Han	73	2	40	ethnic Han
74	2	33	ethnic Han	74	2	34	ethnic Han	74	2	33	ethnic Han	74	1	54	ethnic Han	74	2	37	ethnic Han	74	1	27	ethnic Han	74	1	33	ethnic Han	74	2	37	ethnic Han
75	1	42	ethnic Han	75	2	28	ethnic Han	75	1	42	ethnic Han	75	2	53	ethnic Han	75	1	28	ethnic Han	75	1	27	ethnic Han	75	1	34	ethnic Han	75	2	41	ethnic Han
76	1	52	ethnic Han	76	2	38	ethnic Han	76	1	52	ethnic Han	76	1	53	ethnic Han	76	1	32	ethnic Han	76	1	33	ethnic Han	76	2	36	ethnic Han	76	2	35	ethnic Han
77	2	54	ethnic Han	77	2	36	ethnic Han	77	2	54	ethnic Han	77	1	44	ethnic Han	77	1	35	ethnic Han	77	1	31	ethnic Han	77	2	39	ethnic Han	77	2	38	ethnic Han
78	1	49	ethnic Han	78	2	39	ethnic Han	78	1	49	ethnic Han	78	1	46	ethnic Han	78	1	32	ethnic Han	78	1	31	ethnic Han	78	2	28	ethnic Han	78	2	35	ethnic Han
79	2	30	ethnic Han	79	2	32	ethnic Han	79	2	30	ethnic Han	79	2	56	ethnic Han	79	2	38	ethnic Han	79	1	37	ethnic Han	79	1	32	ethnic Han	79	2	36	ethnic Han
80	1	36	ethnic Han	80	2	28	ethnic Han	80	1	36	ethnic Han	80	2	52	ethnic Han	80	1	33	ethnic Han	80	2	23	ethnic Han	80	2	39	ethnic Han	80	1	30	ethnic Han
81	1	36	ethnic Han	81	1	32	ethnic Han	81	1	36	ethnic Han	81	1	52	ethnic Han	81	2	33	ethnic Han	81	1	57	ethnic Han	81	2	34	ethnic Han	81	1	39	ethnic Han
82	1	24	ethnic Han	82	1	27	ethnic Han	82	1	24	ethnic Han	82	1	55	ethnic Han	82	1	38	ethnic Han	82	2	46	ethnic Han	82	2	24	ethnic Han	82	2	26	ethnic Han
83	2	33	ethnic Han	83	1	59	ethnic Han	83	2	33	ethnic Han	83	2	44	ethnic Han	83	2	36	ethnic Han	83	1	46	ethnic Han	83	2	39	ethnic Han	83	1	38	ethnic Han
84	1	36	ethnic Han	84	1	59	ethnic Han	84	1	36	ethnic Han	84	1	58	ethnic Han	84	1	35	ethnic Han	84	2	51	ethnic Han	84	2	26	ethnic Han	84	2	35	ethnic Han
85	1	26	ethnic Han	85	1	53	ethnic Han	85	1	26	ethnic Han	85	1	42	ethnic Han	85	2	25	ethnic Han	85	2	43	ethnic Han	85	2	34	ethnic Han	85	2	34	ethnic Han
86	2	39	ethnic Han	86	1	46	ethnic Han	86	2	39	ethnic Han	86	1	50	ethnic Han	86	2	33	ethnic Han	86	1	48	ethnic Han	86	2	22	ethnic Han	86	2	26	ethnic Han
87	1	33	ethnic Han	87	1	41	ethnic Han	87	1	33	ethnic Han	87	1	45	ethnic Han	87	2	38	ethnic Han	87	2	45	ethnic Han	87	1	27	ethnic Han	87	1	25	ethnic Han
88	1	30	ethnic Han	88	2	31	ethnic Han	88	1	30	ethnic Han	88	1	49	ethnic Han	88	1	40	ethnic Han	88	1	50	ethnic Han	88	2	26	ethnic Han	88	1	28	ethnic Han
89	2	25	ethnic Han	89	2	33	ethnic Han	89	2	25	ethnic Han	89	1	48	ethnic Han	89	2	29	ethnic Han	89	1	47	ethnic Han	89	2	31	ethnic Han	89	1	35	ethnic Han
90	2	29	ethnic Han	90	2	35	ethnic Han	90	2	29	ethnic Han	90	1	59	ethnic Han	90	1	33	ethnic Han	90	1	50	ethnic Han	90	2	40	ethnic Han	90	2	35	ethnic Han
91	2	26	ethnic Han	91	2	43	ethnic Han	91	2	26	ethnic Han	91	2	58	ethnic Han	91	1	24	ethnic Han	91	1	57	ethnic Han	91	1	31	ethnic Han	91	1	30	ethnic Han
			ethnic Han	92	2	43	ethnic Han				ethnic Han	92	2	49	ethnic Han	92	1	33	ethnic Han	92	2	42	ethnic Han	92	2	35	ethnic Han	92	2	40	ethnic Han
			ethnic Han	93	1	35	ethnic Han				ethnic Han	93	1	58	ethnic Han	93	2	34	ethnic Han	93	1	45	ethnic Han	93	1	37	ethnic Han	93	1	32	ethnic Han
			ethnic Han	94	2	41	ethnic Han				ethnic Han	94	1	43	ethnic Han	94	1	32	ethnic Han	94	2	51	ethnic Han	94	2	22	ethnic Han	94	2	39	ethnic Han
			ethnic Han	95	2	37	ethnic Han				ethnic Han	95	2	47	ethnic Han	95	2	32	ethnic Han	95	1	51	ethnic Han	95	2	36	ethnic Han	95	2	37	ethnic Han
			ethnic Han	96	2	33	ethnic Han				ethnic Han	96	1	55	ethnic Han	96	2	26	ethnic Han	96	1	50	ethnic Han	96	1	57	ethnic Han	96	1	23	ethnic Han
			ethnic Han	97	1	50	ethnic Han				ethnic Han	97	1	47	ethnic Han	97	2	32	ethnic Han	97	1	42	ethnic Han	97	1	51	ethnic Han	97	2	28	ethnic Han
			ethnic Han	98	2	38	ethnic Han				ethnic Han	98	1	42	ethnic Han	98	1	25	ethnic Han	98	2	48	ethnic Han	98	2	50	ethnic Han	98	2	32	ethnic Han
			ethnic Han	99	2	45	ethnic Han				ethnic Han	99	1	45	ethnic Han	99	1	34	ethnic Han	99	1	46	ethnic Han	99	1	43	ethnic Han	99	2	40	ethnic Han
			ethnic Han	100	2	29	ethnic Han				ethnic Han	100	2	48	ethnic Han	100	1	31	ethnic Han	100	2	58	ethnic Han	100	1	48	ethnic Han	100	2	38	ethnic Han
			ethnic Han	101	1	44	ethnic Han				ethnic Han				ethnic Han	101	2	43	ethnic Han	101	2	41	ethnic Han	101	1	50	ethnic Han	101	1	53	ethnic Han
			ethnic Han	102	1	25	ethnic Han				ethnic Han				ethnic Han	102	2	38	ethnic Han	102	1	43	ethnic Han	102	1	46	ethnic Han	102	1	48	ethnic Han
			ethnic Han	103	1	35	ethnic Han				ethnic Han				ethnic Han	103	1	34	ethnic Han	103	1	55	ethnic Han	103	1	48	ethnic Han	103	1	43	ethnic Han
			ethnic Han	104	1	33	ethnic Han				ethnic Han				ethnic Han	104	1	24	ethnic Han	104	1	49	ethnic Han	104	2	41	ethnic Han	104	1	53	ethnic Han
			ethnic Han	105	2	50	ethnic Han				ethnic Han				ethnic Han	105	2	28	ethnic Han	105	2	52	ethnic Han	105	1	58	ethnic Han	105	2	41	ethnic Han
			ethnic Han	106	1	58	ethnic Han				ethnic Han				ethnic Han	106	2	26	ethnic Han	106	1	42	ethnic Han	106	1	46	ethnic Han	106	1	50	ethnic Han
			ethnic Han	107	1	51	ethnic Han				ethnic Han				ethnic Han	107	2	27	ethnic Han	107	2	41	ethnic Han	107	1	50	ethnic Han	107	1	53	ethnic Han
			ethnic Han	108	2	48	ethnic Han				ethnic Han				ethnic Han	108	2	35	ethnic Han	108	2	56	ethnic Han	108	1	49	ethnic Han	108	1	50	ethnic Han
			ethnic Han	109	2	48	ethnic Han				ethnic Han				ethnic Han	109	2	38	ethnic Han	109	2	49	ethnic Han	109	2	46	ethnic Han	109	2	49	ethnic Han
			ethnic Han	110	1	44	ethnic Han				ethnic Han				ethnic Han	110	1	25	ethnic Han	110	1	56	ethnic Han	110	1	56	ethnic Han	110	2	45	ethnic Han
			ethnic Han	111	1	37	ethnic Han				ethnic Han								ethnic Han	111	2	51	ethnic Han	111	2	51	ethnic Han	111	1	59	ethnic Han
			ethnic Han	112	2	41	ethnic Han				ethnic Han								ethnic Han	112	1	42	ethnic Han	112	2	46	ethnic Han	112	1	58	ethnic Han
			ethnic Han	113	2	45	ethnic Han				ethnic Han								ethnic Han	113	1	44	ethnic Han	113	2	42	ethnic Han	113	1	57	ethnic Han
			ethnic Han	114	2	42	ethnic Han				ethnic Han								ethnic Han	114	1	44	ethnic Han	114	1	45	ethnic Han	114	1	55	ethnic Han
			ethnic Han	115	2	39	ethnic Han				ethnic Han								ethnic Han	115	1	44	ethnic Han	115	1	58	ethnic Han	115	2	49	ethnic Han
			ethnic Han	116	2	46	ethnic Han				ethnic Han								ethnic Han	116	2	47	ethnic Han	116	1	50	ethnic Han	116	2	49	ethnic Han
			ethnic Han	117	1	36	ethnic Han				ethnic Han								ethnic Han	117	1	45	ethnic Han	117	1	43	ethnic Han	117	1	41	ethnic Han
			ethnic Han	118	2	40	ethnic Han				ethnic Han								ethnic Han	118	1	52	ethnic Han	118	2	43	ethnic Han	118	1	53	ethnic Han
			ethnic Han	119	1	45	ethnic Han				ethnic Han								ethnic Han	119	1	48	ethnic Han	119	1	43	ethnic Han	119	2	52	ethnic Han
			ethnic Han	120	2	47	ethnic Han				ethnic Han								ethnic Han	120	2	51	ethnic Han	120	1	44	ethnic Han	120	2	53	ethnic Han
			ethnic Han	121	1	57	ethnic Han				ethnic Han								ethnic Han	121	2	42	ethnic Han	121	2	48	ethnic Han	121	2	43	ethnic Han
			ethnic Han	122	1	39	ethnic Han				ethnic Han								ethnic Han	122	2	51	ethnic Han	122	2	58	ethnic Han	122	1	56	ethnic Han
			ethnic Han	123	2	55	ethnic Han				ethnic Han								ethnic Han	123	1	52	ethnic Han	123	2	43	ethnic Han	123	2	52	ethnic Han
			ethnic Han	124	1	41	ethnic Han				ethnic Han								ethnic Han	124	2	51	ethnic Han	124	2	52	ethnic Han	124	1	49	ethnic Han
			ethnic Han	125	1	38	ethnic Han				ethnic Han								ethnic Han	125	1	45	ethnic Han	125	1	43	ethnic Han	125	2	50	ethnic Han
			ethnic Han				ethnic Han				ethnic Han								ethnic Han	126	1	46	ethnic Han	126	1	45	ethnic Han	126	1	51	ethnic Han
			ethnic Han				ethnic Han				ethnic Han								ethnic Han	127	1	54	ethnic Han	127	2	51	ethnic Han	127	1	59	ethnic Han
			ethnic Han				ethnic Han				ethnic Han								ethnic Han	128	1	46	ethnic Han	128	2	51	ethnic Han	128	1	46	ethnic Han
			ethnic Han				ethnic Han				ethnic Han								ethnic Han	129	2	47	ethnic Han	129	1	50	ethnic Han	129	2	52	ethnic Han
			ethnic Han				ethnic Han				ethnic Han								ethnic Han	130	1	44	ethnic Han	130	1	45	ethnic Han	130	2	43	ethnic Han
			ethnic Han				ethnic Han				ethnic Han								ethnic Han	131	1	45	ethnic Han	131	2	56	ethnic Han	131	1	45	ethnic Han
			ethnic Han				ethnic Han				ethnic Han								ethnic Han	132	1	50	ethnic Han	132	2	56	ethnic Han	132	2	43	ethnic Han
			ethnic Han				ethnic Han				ethnic Han								ethnic Han	133	2	44	ethnic Han	133	2	51	ethnic Han	133	1	40	ethnic Han
			ethnic Han				ethnic Han				ethnic Han								ethnic Han	134	1	41	ethnic Han	134	2	51	ethnic Han	134	2	53	ethnic Han
			ethnic Han				ethnic Han				ethnic Han								ethnic Han	135	2	54	ethnic Han	135	2	42	ethnic Han	135	2	42	ethnic Han
			ethnic Han				ethnic Han				ethnic Han								ethnic Han	136	2	48	ethnic Han	136	2	42	ethnic Han	136	1	46	ethnic Han
			ethnic Han				ethnic Han				ethnic Han								ethnic Han	137	2	51	ethnic Han	137	1	49	ethnic Han	137	2	51	ethnic Han
			ethnic Han				ethnic Han				ethnic Han								ethnic Han	138	2	42	ethnic Han	138	2	51	ethnic Han	138	1	54	ethnic Han
			ethnic Han				ethnic Han				ethnic Han								ethnic Han	139	1	42	ethnic Han	139	2	42	ethnic Han	139	2	42	ethnic Han
			ethnic Han				ethnic Han				ethnic Han								ethnic Han	140	1	47	ethnic Han	140	1	58	ethnic Han	140	2	51	ethnic Han
			ethnic Han				ethnic Han				ethnic Han								ethnic Han	141	2	55	ethnic Han	141	2	43	ethnic Han	141	1	52	ethnic Han
			ethnic Han				ethnic Han				ethnic Han								ethnic Han	142	2	44	ethnic Han	142	2	44	ethnic Han	142	2	49	ethnic Han
			ethnic Han				ethnic Han				ethnic Han								ethnic Han	143	2	51	ethnic Han	143	1	46	ethnic Han	143	1	55	ethnic Han
			ethnic Han				ethnic Han				ethnic Han								ethnic Han	144	2	60	ethnic Han	144	1	44	ethnic Han	144	2	44	ethnic Han
			ethnic Han				ethnic Han				ethnic Han								ethnic Han	145	2	54	ethnic Han	145	2	54	ethnic Han	145	2	44	ethnic Han
			ethnic Han				ethnic Han				ethnic Han								ethnic Han	146	2	51	ethnic Han	146	2	47	ethnic Han	146	2	50	ethnic Han
			ethnic Han				ethnic Han				ethnic Han								ethnic Han	147	2	48	ethnic Han	147	2	60	ethnic Han	147	1	56	ethnic Han
			ethnic Han				ethnic Han				ethnic Han								ethnic Han	148	2	50	ethnic Han	148	2	51	ethnic Han	148	2	50	ethnic Han
			ethnic Han				ethnic Han				ethnic Han								ethnic Han	149	2	57	ethnic Han	149	1	52	ethnic Han	149	2	47	ethnic Han
			ethnic Han				ethnic Han				ethnic Han								ethnic Han	150	2	51	ethnic Han	150	2	44	ethnic Han	150	2	49	ethnic Han
			ethnic Han				ethnic Han				ethnic Han								ethnic Han	151	2	43	ethnic Han	151	1	52	ethnic Han	151	1	41	ethnic Han
			ethnic Han				ethnic Han				ethnic Han								ethnic Han	152	2	44	ethnic Han	152	2	47	ethnic Han	152	2	41	ethnic Han
			ethnic Han				ethnic Han				ethnic Han								ethnic Han	153	2	44	ethnic Han	153	2	42	ethnic Han	153	2	41	ethnic Han
			ethnic Han				ethnic Han				ethnic Han								ethnic Han	154	1	55	ethnic Han	154	1	46	ethnic Han	154	1	42	ethnic Han
			ethnic Han				ethnic Han				ethnic Han								ethnic Han	155	1	57	ethnic Han	155	1	46	ethnic Han	155	1	41	ethnic Han
			ethnic Han				ethnic Han				ethnic Han								ethnic Han	156	1	42	ethnic Han	156	2	42	ethnic Han	156	2	42	ethnic Han
			ethnic Han				ethnic Han				ethnic Han								ethnic Han	157	1	57	ethnic Han	157	2	43	ethnic Han	157	1	42	ethnic Han
			ethnic Han				ethnic Han				ethnic Han								ethnic Han	158	1	50	ethnic Han	158	2	44	ethnic Han	158	1	52	ethnic Han
			ethnic Han				ethnic Han				ethnic Han								ethnic Han	159	1	42	ethnic Han	159	2	48	ethnic Han	159	2	42	ethnic Han
			ethnic Han				ethnic Han				ethnic Han								ethnic Han	160	1	55	ethnic Han	160	2	44	ethnic Han	160	2	42	ethnic Han
			ethnic Han				ethnic Han				ethnic Han												ethnic Han	161	1	55	ethnic Han	161	1	44	ethnic Han
			ethnic Han				ethnic Han				ethnic Han												ethnic Han	162	2	50	ethnic Han	162	2	43	ethnic Han
			ethnic Han				ethnic Han				ethnic Han												ethnic Han	163	1	50	ethnic Han	163	1	45	ethnic Han
			ethnic Han				ethnic Han				ethnic Han												ethnic Han	164	1	55	ethnic Han	164	2	45	ethnic Han
			ethnic Han				ethnic Han				ethnic Han												ethnic Han	165	2	49	ethnic Han	165	1	46	ethnic Han
			ethnic Han				ethnic Han				ethnic Han												ethnic Han	166	1	47	ethnic Han	166	1	47	ethnic Han
			ethnic Han				ethnic Han				ethnic Han												ethnic Han	167	1	43	ethnic Han	167	2	48	ethnic Han
			ethnic Han				ethnic Han				ethnic Han												ethnic Han	168	1	46	ethnic Han	168	1	48	ethnic Han
			ethnic Han				ethnic Han				ethnic Han												ethnic Han	169	1	57	ethnic Han	169	2	49	ethnic Han
			ethnic Han				ethnic Han				ethnic Han												ethnic Han	170	1	45	ethnic Han	170	2	50	ethnic Han
			ethnic Han				ethnic Han				ethnic Han												ethnic Han	171	2	48	ethnic Han	171	2	51	ethnic Han
			ethnic Han				ethnic Han				ethnic Han												ethnic Han	172	2	51	ethnic Han	172	1	51	ethnic Han
			ethnic Han				ethnic Han				ethnic Han												ethnic Han	173	2	51	ethnic Han	173	1	53	ethnic Han
			ethnic Han				ethnic Han				ethnic Han												ethnic Han	174	2	44	ethnic Han	174	1	57	ethnic Han
			ethnic Han				ethnic Han				ethnic Han												ethnic Han	175	2	50	ethnic Han	175	1	59	ethnic Han
			ethnic Han				ethnic Han				ethnic Han												ethnic Han	176	1	42	ethnic Han	176	2	41	ethnic Han
			ethnic Han				ethnic Han				ethnic Han												ethnic Han	177	1	55	ethnic Han	177	2	43	ethnic Han
			ethnic Han				ethnic Han				ethnic Han												ethnic Han	178	1	41	ethnic Han	178	2	43	ethnic Han
			ethnic Han				ethnic Han				ethnic Han												ethnic Han	179	1	51	ethnic Han	179	2	44	ethnic Han
			ethnic Han				ethnic Han				ethnic Han												ethnic Han	180	1	42	ethnic Han	180	1	44	ethnic Han
			ethnic Han				ethnic Han				ethnic Han												ethnic Han	181	2	55	ethnic Han	181	2	43	ethnic Han
			ethnic Han				ethnic Han				ethnic Han												ethnic Han	182	2	57	ethnic Han	182	2	50	ethnic Han
			ethnic Han				ethnic Han				ethnic Han												ethnic Han	183	1	49	ethnic Han	183	2	43	ethnic Han
			ethnic Han				ethnic Han				ethnic Han												ethnic Han	184	2	48	ethnic Han	184	1	44	ethnic Han
			ethnic Han				ethnic Han				ethnic Han												ethnic Han	185	2	52	ethnic Han	185	1	44	ethnic Han
			ethnic Han				ethnic Han				ethnic Han												ethnic Han	186	2	47	ethnic Han	186	1	60	ethnic Han
			ethnic Han				ethnic Han				ethnic Han												ethnic Han	187	2	44	ethnic Han	187	2	42	ethnic Han
			ethnic Han				ethnic Han				ethnic Han												ethnic Han	188	1	50	ethnic Han	188	1	55	ethnic Han
			ethnic Han				ethnic Han				ethnic Han												ethnic Han	189	2	42	ethnic Han	189	1	43	ethnic Han
			ethnic Han				ethnic Han				ethnic Han												ethnic Han	190	2	49	ethnic Han	190	2	48	ethnic Han
			ethnic Han				ethnic Han				ethnic Han																ethnic Han	191	1	48	ethnic Han
			ethnic Han				ethnic Han				ethnic Han																ethnic Han	192	1	53	ethnic Han
			ethnic Han				ethnic Han				ethnic Han																ethnic Han	193	1	53	ethnic Han
			ethnic Han				ethnic Han				ethnic Han																ethnic Han	194	1	56	ethnic Han
			ethnic Han				ethnic Han				ethnic Han																ethnic Han	195	1	60	ethnic Han
			ethnic Han				ethnic Han				ethnic Han																ethnic Han	196	2	52	ethnic Han
			ethnic Han				ethnic Han				ethnic Han																ethnic Han	197	2	47	ethnic Han
			ethnic Han				ethnic Han				ethnic Han																ethnic Han	198	1	45	ethnic Han
			ethnic Han				ethnic Han				ethnic Han																ethnic Han	199	2	41	ethnic Han
			ethnic Han				ethnic Han				ethnic Han																ethnic Han	200	2	50	ethnic Han
