# Supplementary material for: Evaluation of antibody kinetics and durability in healthy individuals vaccinated with inactivated COVID-19 vaccine (CoronaVac): A cross-sectional and cohort study in Zhejiang, China
Source: eLife. 2023 Mar 16;12:e84056. doi: 10.7554/eLife.84056 (PMC10110235; doi:10.7554/eLife.84056)
Supplement: Table 2—source data 1. [file elife-84056-table2-data1.xlsx]

## Sheet: n=90
number	sex(male=1, female=2)	age	age group	nation	BMI	Chronic conditions(yes=1, no=2)
333653	2	24	18-44	ethnic Han	29	2
333910	2	24	18-44	ethnic Han	19.1	2
333658	1	27	18-44	ethnic Han	25.2	2
333913	1	27	18-44	ethnic Han	17.7	2
333649	1	28	18-44	ethnic Han	26.8	1
333664	2	28	18-44	ethnic Han	36.7	2
333632	1	29	18-44	ethnic Han	24.2	2
333626	1	30	18-44	ethnic Han	26.9	2
333641	1	30	18-44	ethnic Han	21.2	2
333630	2	31	18-44	ethnic Han	19.1	2
333621	1	32	18-44	ethnic Han	23.6	2
333625	1	33	18-44	ethnic Han	26.6	2
333171	2	34	18-44	ethnic Han	24	2
333628	1	34	18-44	ethnic Han	33.7	2
333647	2	34	18-44	ethnic Han	19.9	2
333657	2	34	18-44	ethnic Han	19.5	2
333642	2	35	18-44	ethnic Han	23.1	2
333622	2	37	18-44	ethnic Han	23.3	1
333633	1	37	18-44	ethnic Han	19.5	2
333637	1	38	18-44	ethnic Han	22.1	2
333654	2	38	18-44	ethnic Han	21.2	2
333680	1	38	18-44	ethnic Han	22.5	2
333174	2	39	18-44	ethnic Han	26.4	2
333631	2	39	18-44	ethnic Han	21.5	2
333638	2	40	18-44	ethnic Han	27.1	2
333656	2	40	18-44	ethnic Han	24.9	2
333672	2	41	18-44	ethnic Han	23.5	2
333640	2	44	18-44	ethnic Han	24.8	1
333679	1	47	45-64	ethnic Han	19.6	2
333624	1	48	45-64	ethnic Han	21.9	1
333176	2	49	45-64	ethnic Han	20.3	2
333635	2	49	45-64	ethnic Han	19.9	1
333636	1	49	45-64	ethnic Han	24.2	2
333179	2	50	45-64	ethnic Han	23.3	2
333675	2	50	45-64	ethnic Han	21.6	2
333648	1	53	45-64	ethnic Han	22.3	2
333660	2	53	45-64	ethnic Han	23.1	1
333177	2	54	45-64	ethnic Han	24.9	2
333651	2	56	45-64	ethnic Han	22.7	2
333385	1	61	45-64	ethnic Han	26.6	1
333856	2	62	45-64	ethnic Han	23	2
333354	2	63	45-64	ethnic Han	24.3	2
333853	1	63	45-64	ethnic Han	23.7	1
333341	2	64	45-64	ethnic Han	20.4	1
333394	1	64	45-64	ethnic Han	23.9	2
333835	1	64	45-64	ethnic Han	21.2	2
333839	1	64	45-64	ethnic Han	24.1	2
333841	2	64	45-64	ethnic Han	23.3	2
333843	1	64	45-64	ethnic Han	20.8	2
333345	2	66	65-80	ethnic Han	19.1	1
333353	2	66	65-80	ethnic Han	18.1	2
333842	1	66	65-80	ethnic Han	24.6	1
333847	1	66	65-80	ethnic Han	20.8	2
333362	2	67	65-80	ethnic Han	24	2
333387	1	67	65-80	ethnic Han	22.9	2
333862	2	67	65-80	ethnic Han	24.8	1
333331	2	68	65-80	ethnic Han	18.7	2
333342	2	68	65-80	ethnic Han	18.9	2
333346	2	68	65-80	ethnic Han	21.1	2
333351	2	68	65-80	ethnic Han	31.6	1
333831	2	68	65-80	ethnic Han	23	2
333838	2	68	65-80	ethnic Han	25.5	1
333844	1	68	65-80	ethnic Han	18.8	1
333859	1	68	65-80	ethnic Han	23.6	2
333860	2	68	65-80	ethnic Han	26.9	1
333364	2	69	65-80	ethnic Han	21.5	2
333861	1	69	65-80	ethnic Han	22.8	1
333340	2	70	65-80	ethnic Han	20.2	2
333356	2	70	65-80	ethnic Han	24.7	2
333845	2	70	65-80	ethnic Han	19.1	2
333854	2	70	65-80	ethnic Han	26.2	1
333837	2	71	65-80	ethnic Han	24.2	2
333857	2	71	65-80	ethnic Han	21.1	1
333347	2	72	65-80	ethnic Han	22.4	1
333370	1	72	65-80	ethnic Han	20	2
333374	1	72	65-80	ethnic Han	23.9	2
333376	1	72	65-80	ethnic Han	21.5	2
333834	1	72	65-80	ethnic Han	21.1	1
333343	2	73	65-80	ethnic Han	22.4	1
333391	1	73	65-80	ethnic Han	23.1	2
333846	1	73	65-80	ethnic Han	25.8	1
333849	1	73	65-80	ethnic Han	26	1
333858	1	73	65-80	ethnic Han	20.8	2
333358	2	74	65-80	ethnic Han	20.3	1
333840	1	74	65-80	ethnic Han	19.1	1
333367	2	75	65-80	ethnic Han	22.9	1
333401	1	75	65-80	ethnic Han	17.3	1
333836	1	75	65-80	ethnic Han	25.5	1
333355	2	77	65-80	ethnic Han	22.1	1
333832	1	77	65-80	ethnic Han	22	2
